1 **Amyloid  $\beta$  Induces Lipid Droplet-Mediated Microglial Dysfunction in Alzheimer's Disease**

2

3 Priya Prakash<sup>1#</sup>, Palak Manchanda<sup>1#</sup>, Evi Paouri<sup>2</sup>, Kanchan Bisht<sup>1</sup>, Kaushik Sharma<sup>1</sup>, Prageeth R.  
4 Wijewardhane<sup>1</sup>, Caitlin E. Randolph<sup>1</sup>, Matthew G. Clark<sup>1</sup>, Jonathan Fine<sup>1</sup>, Elizabeth A. Thayer<sup>1</sup>,  
5 Alexis Crockett<sup>2</sup>, Nadia Gasmi<sup>2</sup>, Sarah Stanko<sup>2</sup>, Richard A. Prayson<sup>3</sup>, Chi Zhang<sup>1</sup>, Dimitrios  
6 Davalos<sup>2,4\*</sup>, Gaurav Chopra<sup>1,5,6,7,8\*</sup>

7

8 <sup>1</sup>Department of Chemistry, Purdue University, West Lafayette, IN 47907, USA

9 <sup>2</sup>Department of Neurosciences, Lerner Research Institute, Cleveland Clinic, Cleveland, OH 44106,  
10 USA

11 <sup>3</sup>Department of Anatomic Pathology, Cleveland Clinic, Cleveland, OH 44106, USA

12 <sup>4</sup>Department of Molecular Medicine, Cleveland Clinic Lerner College of Medicine of Case,  
13 Western Reserve University, Cleveland, OH 44106, USA

14 <sup>5</sup>Purdue Institute for Integrative Neuroscience, Purdue University, West Lafayette, IN 47907, USA

15 <sup>6</sup>Purdue Institute for Drug Discovery, Purdue University, West Lafayette, IN 47907, USA

16 <sup>7</sup>Purdue Center for Cancer Research, Purdue University, West Lafayette, IN 47907, USA

17 <sup>8</sup>Purdue Institute of Inflammation, Immunology and Infectious Disease, Purdue University, West  
18 Lafayette, IN 47907, USA

19

20

21 #These authors contributed equally to this work

22 \*Correspondence:

23 Dimitrios Davalos, Ph.D.; [davalod@ccf.org](mailto:davalod@ccf.org)

24 Gaurav Chopra, Ph.D.; [gchopra@purdue.edu](mailto:gchopra@purdue.edu)

25

26 **Summary**

27

28 Several microglia-expressed genes have emerged as top risk variants for Alzheimer's disease  
29 (AD). Impaired microglial phagocytosis is one of the main proposed outcomes by which these  
30 AD-risk genes may contribute to neurodegeneration, but the mechanisms translating genetic  
31 association to cellular dysfunction remain unknown. Here we show that microglia form lipid  
32 droplets (LDs) upon exposure to amyloid-beta ( $A\beta$ ), and that their LD load increases with  
33 proximity to amyloid plaques in brains from human patients and the AD mouse model 5xFAD.  
34 LD formation is dependent upon age and disease progression and is more prominent in the  
35 hippocampus in mice and humans. Despite variability in LD load between microglia from male  
36 versus female animals and between cells from different brain regions, LD-laden microglia  
37 exhibited a deficit in  $A\beta$  phagocytosis. Unbiased lipidomic analysis identified a substantial  
38 decrease in free fatty acids (FFAs) and a parallel increase in triacylglycerols (TAGs) as the key  
39 metabolic transition underlying LD formation. We demonstrate that DGAT2, a key enzyme for the  
40 conversion of FFAs to TAGs, promotes microglial LD formation, is increased in microglia from  
41 5xFAD and human AD brains, and that inhibiting DGAT2 improved microglial uptake of  $A\beta$ .  
42 These findings identify a new lipid-mediated mechanism underlying microglial dysfunction that  
43 could become a novel therapeutic target for AD.

44

45 **Keywords**

46

47 Microglia, lipids, lipidomics, lipid droplets, Alzheimer's disease, metabolism, neurodegeneration,  
48 phagocytosis, glia

49

50

51

52

53

54

55

56

57

58

59

60

61

62

63

64

65

66

67

68

69

70

71

72

## 73 **Introduction**

74

75 Alzheimer's disease (AD) is a progressive neurodegenerative disorder of the aging human  
76 population. Accumulation of amyloid-beta ( $A\beta$ ) is a defining histological hallmark of the AD  
77 brain<sup>1</sup>. However, failures in  $A\beta$ -targeted clinical trials<sup>2</sup>, combined with findings showing no  
78 apparent correlation between cognitive decline and overall plaque load in AD patients<sup>3</sup>, suggest  
79 that additional mechanisms may be crucially involved in AD etiopathogenesis. Genome-wide  
80 association studies (GWAS) identified many AD risk genes related to the immune response and  
81 microglia, including the phagocytic receptors CD33 and TREM2<sup>4,5,6,7,8</sup>. Single-cell RNA  
82 sequencing identified gene signatures characteristic of prominent protective and dysfunctional  
83 microglial subpopulations in AD<sup>9,10</sup>. Moreover, a study that focused on human brain disease-  
84 associated variants of non-coding regulatory regions in a cell-specific manner identified multiple  
85 sporadic AD risk variants specifically in microglial transcriptional enhancers<sup>11</sup>, further  
86 highlighting the involvement of microglia in AD pathogenesis.

87

88 In the AD brain, reactive microglia cluster around  $A\beta$  plaques<sup>12</sup> and form a physical barrier  
89 believed to restrict plaque propagation<sup>13,14</sup>. During early stages of AD, microglial reactivity is  
90 considered as beneficial for  $A\beta$  clearance<sup>15</sup>; however, sustained inflammation likely contributes to  
91 neurodegeneration<sup>12</sup>. Increased pro-inflammatory gene expression in response to accumulating  $A\beta$   
92 in older AD mice leads to decreased microglial  $A\beta$  clearance receptors or  $A\beta$ -degrading enzymes,  
93 thereby promoting further  $A\beta$  accumulation<sup>16</sup>. Furthermore, the ability of microglia to remove  $A\beta$   
94 declines over time, supporting that the progression of amyloid pathology correlates with impaired  
95 capacity of microglia to phagocytose  $A\beta$ <sup>17,16</sup>.

96

97 In addition to genes and proteins, changes in microglial lipid content can also affect their state and  
98 function<sup>18,19,20,21</sup>. Cellular lipids regulate functions like migration and phagocytosis<sup>22</sup>, are  
99 important for immune cell modulation and signaling<sup>23</sup>, and their dysregulation has been linked to  
100 neurodegenerative disorders, including AD<sup>24</sup>. Top AD-risk genes such as TREM2, APOE, and  
101 INPP5D are directly related to lipid metabolism<sup>25,26,27</sup>. Although lipid droplets (LDs, first  
102 described as fat particles by Alois Alzheimer<sup>28</sup>) were initially considered to be passive fat  
103 deposits<sup>29</sup>, they are dynamic intracellular organelles (diameter <1–100  $\mu$ m) that regulate lipid  
104 metabolism. LDs consist of a phospholipid monolayer containing a core of neutral lipids like  
105 triacylglycerols (TAGs) and cholesteryl esters (CEs)<sup>30</sup>. Inflammatory triggers like  
106 lipopolysaccharide (LPS)<sup>31,19</sup>, fatty acids<sup>32</sup>, and aging<sup>20</sup> can result in LD accumulation in primary  
107 microglial cells and cell lines. Further, human iPSC-derived microglia were enriched in LDs in a  
108 chimeric mouse model of AD<sup>33</sup>. However, it is not known if  $A\beta$  can directly induce LD formation  
109 in microglia, and if/how changes to their lipid or metabolite composition can affect microglial  
110 function in AD.

111

112 Here we show that plaque-associated microglia closely associated with  $A\beta$  plaques contained more  
113 LDs and had larger cell bodies and shorter processes in both mouse and human brains, highlighting  
114 a unique LD-laden microglial subtype in AD. Extensive lipidomic and metabolomic profiling in  
115 microglia revealed specific types of lipids and metabolic pathways likely responsible for their LD-  
116 laden phenotype in the 5xFAD mouse model, which was more pronounced in microglia from  
117 females compared to males. Functionally, LD-laden microglia showed reduced phagocytosis of

118 A $\beta$  compared to age-matched WT microglia. Mechanistically, we found that A $\beta$  treatment alone  
119 promotes a drastic shift in lipid content in microglia isolated from WT brains, even within only 24  
120 hours of A $\beta$  exposure. Extensive lipidomic characterization of these microglia revealed a gradual  
121 increase in TAG content following A $\beta$  treatment, which was similar to the lipid composition  
122 changes we detected in microglia from 5xFAD mice. Based upon this finding, we identified  
123 diacylglycerol O-acyltransferase 2 (DGAT2), a key enzyme for the conversion of FFAs to TAGs,  
124 as also being the key catalyst for A $\beta$ -induced LD formation in microglia. Importantly, DGAT2  
125 protein expression was increased in both mouse and human AD brains, and inhibiting DGAT2  
126 increased the phagocytosis of A $\beta$  by 5xFAD microglia. Our study thus highlights DGAT2 as a  
127 promising target for preventing or reversing phagocytic dysfunction in LD-laden microglia in the  
128 AD brain.

129

130

### 131 **Microglia accumulate lipid droplets in an age-, sex-, and region-dependent manner in the** 132 **5xFAD model of Alzheimer's disease**

133

134 Prior literature has linked the accumulation of LDs in microglia with inflammation, aging, and  
135 impaired phagocytosis, all of which are also hallmarks of AD<sup>31,20,33</sup>. We asked if/how exposure to  
136 A $\beta$  could induce LD formation in microglia, and/or alter their lipid or metabolite composition in a  
137 way that affects their function in AD. We used a mouse model with five familial AD mutations  
138 (5xFAD)<sup>34</sup>, which progressively accumulates extensive A $\beta$  plaques (especially in the subiculum  
139 and deep cortical layers) starting around 2-3 months of age. 5xFAD mice also develop prominent  
140 gliosis, inflammation, neuronal loss, behavioral impairments, and sex-distinct systemic metabolic  
141 changes<sup>35,34,36</sup>. We isolated microglia from 5xFAD and WT mice and performed flow cytometry  
142 analysis after staining for their neutral lipids (**Fig. 1a**; **Fig. S1a**). Although there was no difference  
143 in younger mice (**Fig. 1b**), microglia from 5-7-month-old female 5xFAD mice showed  
144 significantly higher LD content (1.58-fold) compared to cells from age-matched controls. Among  
145 LD<sup>+</sup> cells, almost all 5xFAD microglia had high LD content, whereas WT microglia had lower LD  
146 content (**Fig. 1c**). Microglia from 5-7-month-old male 5xFAD mice also showed a significant but  
147 modest increase (1.15-fold) in LDs compared to WT (**Fig. 1d**), however a higher number of LD<sup>+</sup>  
148 microglia had high LD content in cells from 5xFAD compared to WT male mice (**Fig. 1e**). These  
149 findings demonstrate that microglia show increased LD load, in a mouse model of AD with  
150 extensive A $\beta$  brain deposition, albeit with some age- and sex-dependent variability.

151

152 Next, we investigated if acutely-isolated microglia from 5xFAD mice showed alterations in their  
153 global lipid and metabolite profiles as they experienced a drastic increase in A $\beta$  plaque load with  
154 age. We performed unbiased mass spectrometry lipidomic and metabolomic profiling using a  
155 modified multiple reaction monitoring (MRM)<sup>37</sup> approach that allowed us to screen 1380 lipid  
156 species, categorized into 10 main classes (**Fig. S1b**), and over 700 metabolites. Such broad  
157 coverage and depth of profiling allowed us to explore possible differences in the lipid profiles of  
158 microglia from 5-7-month-old male and female 5xFAD mice and compare them to those from age-  
159 and sex-matched WT microglia in an unbiased manner (**Supplementary Tables ST1-ST2**).  
160 Female 5xFAD microglia showed clearly distinct profiles, (indicated by their clear separation in  
161 the principal component analysis (PCA) space, accounting for over 95% of the variation in the  
162 data) (**Fig. 1f**), with 105 differentially-regulated lipids that were primarily downregulated,  
163 compared to cells from WT controls (**Fig. S1c-e**).

164  
165 We further evaluated triacylglycerol (TAG) profiles in female microglia and found an increase in  
166 several long-chain species, including TAG(48:0), TAG(50:2), TAG(50:0), TAG(52:2),  
167 TAG(52:0) in 5xFAD compared to WT cells (**Fig. 1g, Supplementary Table ST3**). In contrast,  
168 the male lipidome showed less variability (poor separation in the PCA space) (**Fig. S1f**), in  
169 agreement with the more limited variation in LD content in male microglia when analyzed at the  
170 single-cell level (**Fig. 1d**). We also compared microglial metabolite profiles from the same tissues  
171 and found them to be distinctly different (**Fig. S2a**). Metabolites like fructose 6-phosphate and  
172 lactose were downregulated in 5xFAD male and female microglia compared to cells from WT  
173 controls, affecting several key metabolic pathways such as the citrate TCA cycle, glutamine and  
174 glutamate metabolism, arginine biosynthesis, etc. (**Fig S2b-c, Supplementary Tables ST4, ST5**).  
175 These results illustrate that following prolonged A $\beta$  exposure, microglia exhibit: i) a unique lipid  
176 signature that likely facilitates the formation and accumulation of LDs within them in a sex-distinct  
177 manner, and ii) dysregulation in several key metabolic pathways, that could also impact their  
178 functions in the context of AD.

### 179 180 **Microglia have increased LD content in the hippocampus of 5xFAD mice and AD patients**

181  
182 We next asked if/how the increased LD content and related metabolic changes related to brain  
183 amyloid deposition, one of the prominent pathological hallmarks of 5xFAD mice and AD brains.  
184 We examined the spatial distribution of LDs by performing label-free stimulated Raman scattering  
185 (SRS) microscopy<sup>38</sup> in hippocampal brain slices of 5xFAD mice. We found a significantly higher  
186 number of LDs, and a higher percentage of LD area overall, in chronic 5xFAD compared to age-  
187 matched WT hippocampi (**Fig. 1h**). Interestingly, some LDs appeared in close proximity to A $\beta$   
188 plaques in the 5xFAD tissue, as identified by their respective spectral signatures (**Fig. S3**).

189  
190 To further profile the spatial distribution of LD-laden microglia relative to amyloid plaques, we  
191 combined histological staining with methoxy O4 (amyloid plaques) and LipidTox (lipids) with  
192 immunohistochemistry for IBA1 (microglia) in 5-7-month-old female 5xFAD brain sections. Even  
193 though aged WT brains had a high number of LDs in microglia (as also previously reported<sup>20</sup>), and  
194 in other cells (**Fig. 1i; S4a**), 5xFAD brains had significantly higher overall LD density and total  
195 LD area in cortex and parts of the hippocampus (CA1 and subiculum) compared to WT (**Fig. S4b-**  
196 **c**). The mean cell body area of LD<sup>+</sup> microglia was not significantly different than that of LD<sup>-</sup> cells  
197 (**Fig. S4d**), nor was the mean cell body area of LD<sup>+</sup> microglia in 5-7-month-old female 5xFAD  
198 mice compared to LD<sup>+</sup> cells in age and sex-matched WT controls (**Fig. S4e**). Similarly, the overall  
199 proportion of LD<sup>+</sup> microglia was similar across cortex, CA1, and subiculum (**Fig. S4f**), but the  
200 proportion of LD area within microglia was significantly increased in the subiculum of 5xFAD  
201 mice (**Fig. 1j**), indicating a preferential increase in LD load within microglia in this brain region.

202  
203 Since the hippocampus is significantly affected by amyloid pathology in AD patients<sup>39</sup>, we also  
204 stained postmortem human hippocampal sections from non-symptomatic (NS) and AD patients  
205 for A $\beta$  plaques, LDs, and microglia (**Fig. 1k**). After 3D reconstruction and segmentation of each  
206 stained structure imaged by high-resolution confocal microscopy, we performed volumetric co-  
207 localization analysis using Imaris (**Fig. S5**). We measured significantly higher (5.7-fold increase)  
208 overall LD density (**Fig. 1l; Fig. S6**), and—similar to the mouse model findings—a significantly



209 higher percentage of microglial volume occupied by LDs in the hippocampus of AD patients  
210 compared to NS controls in both males and females (**Fig. 1m**).

211  
212 **Chronic exposure of microglia to A $\beta$  plaques promotes LD accumulation, alters microglial**  
213 **morphology, and impairs their phagocytic ability**

214  
215 We next examined the spatial relationship between plaque load and LD density and found them to  
216 be positively correlated in the cortex, CA1, and subiculum (**Fig. 2a**). Interestingly, the vast  
217 majority of plaque-proximal microglia were laden with LDs in all three brain regions (**Fig. 2b**;  
218 **Fig. S7a**). Particularly in the subiculum, plaque-proximal microglia demonstrated an amoeboid  
219 morphology, while plaque-distant cells typically had smaller cell bodies and longer processes (**Fig.**  
220 **2c-d**; **Fig. S7b, c**). Importantly, this also translated in human microglia in the hippocampus of AD  
221 patients (both male and female), where plaque-proximal microglia had a significantly higher  
222 number of LDs than plaque-distant microglia, which decreased with distance from the nearest  
223 plaque (**Fig. 2e, f**; **Fig. S7d**; **Supplementary Movie 1**). In addition, LD<sup>+</sup> microglia closer to  
224 plaques (0-10 $\mu$ m) contained larger LDs, and their total LD load also decreased progressively with  
225 distance from the nearest plaque (**Fig. 2g**; **Fig. S7e**). The methodological approach implemented  
226 in Imaris to identify PLIN2<sup>+</sup>IBA1<sup>+</sup> cells and their LD load as a function of distance from the nearest  
227 plaque is schematically represented in **Fig S8**. Overall, these results suggest that a  
228 morphologically-distinct plaque-associated microglial phenotype characterized by larger LD load  
229 exists in both the human AD brain and the amyloid-rich 5xFAD animal model.

230  
231 Plaque-associated microglia have been previously shown to exhibit morphological and molecular  
232 differences compared to non-plaque-associated cells in AD<sup>40,41,42</sup>. We specifically asked if direct  
233 exposure to A $\beta$  leads to LD formation and changes to phagocytic function in microglia. Microglia  
234 isolated from 5-7-month-old female 5xFAD and WT mice were acutely seeded (1 hour) and treated  
235 with A $\beta$ <sup>pH</sup>—a pH-dependent fluorescent probe that emits green fluorescence in the acidic  
236 lysosomes upon phagocytosis<sup>43</sup>; LDs were then stained with LipidTox, and all cells were analyzed  
237 by flow cytometry (**Fig. 2h, Fig. S9a**). Microglia isolated from WT mice showed a significant  
238 increase in LD content (4.5-fold) upon direct exposure to A $\beta$ <sup>pH</sup> (**Fig. 2i**). However, A $\beta$ <sup>pH</sup> treatment  
239 did not cause a significant increase in LDs in microglia isolated from 5xFAD brains (**Fig. 2j**). This  
240 could indicate that since 5xFAD mice progressively develop A $\beta$  plaques starting at 2 months of  
241 age, chronic microglial exposure to A $\beta$  possibly alters their functional abilities and overall state  
242 by the age of 5-7 months, when amyloid deposition is extensive throughout the brain.

243  
244 Microglial phagocytosis of A $\beta$  is a critical clearance mechanism, and alterations of microglial  
245 phagocytic capacity have been reported in chronic inflammation and AD mouse models<sup>15,16</sup>. We  
246 therefore investigated if the increase in microglial LDs affects their phagocytic capacity. Live  
247 microglia from 5xFAD brains showed a significant (40%) reduction in A $\beta$ <sup>pH</sup> phagocytosis  
248 compared to cells from WT brains (**Fig. S9b-c**). Specifically, out of all microglia, 63.55% and  
249 47.92% were A $\beta$ <sup>pH+</sup> in WT and 5xFAD, respectively (**Fig. 2k**). Interestingly, LD<sup>+</sup> 5xFAD  
250 microglia showed impaired phagocytosis compared to LD<sup>+</sup> WT cells (**Fig. 2l**). Surprisingly, WT  
251 microglia showed an increase in LDs due to acute A $\beta$ <sup>pH</sup> but did not exhibit reduced phagocytic  
252 capacity. In conclusion, these experiments demonstrate that LD-laden microglia that are  
253 chronically exposed to A $\beta$  exhibit a dysfunctional phagocytic phenotype.

254

255  
256  
257  
258

## Direct A $\beta$ exposure is sufficient to significantly alter the microglial lipidome towards lipid droplet formation, independently of inflammatory factors

259 We were surprised to discover that in microglia from 5-7-month-old WT brains, even acute direct  
260 exposure to A $\beta$  *ex vivo* was sufficient to induce large LD formation. Thus, we asked if direct A $\beta$   
261 exposure is sufficient to promote LD formation and/or regulate broad metabolic changes in  
262 microglia independently of other inflammatory factors. We isolated CD11b<sup>+</sup> primary microglia  
263 from 5-7-month-old WT mice, cultured them *in vitro* for 7-10 days and treated them with A $\beta$   
264 aggregates for 1, 12, and 24 hours before assaying both cellular and secretory lipids and  
265 metabolites by mass spectrometry-based MRM-profiling (**Fig. 3a**). We again screened over 1370  
266 lipid species categorized into 10 main classes including FFAs, ceramides, and TAGs  
267 (**Supplementary Tables ST6, ST7**) as well as over 700 metabolites (**Supplementary Tables ST8,**  
268 **S9**). We found considerable differences in the microglial lipidome between A $\beta$ - and vehicle-  
269 treated cells, at 1 hour and 24 hours of A $\beta$  treatment, respectively, suggesting a distinct lipidomic  
270 transition occurring within microglia following exposure to A $\beta$  (**Fig. 3b**).

271  
272 While we observed dramatic changes in several lipid classes, FFAs were the most differentially-  
273 regulated lipid class with acute (1 hour) A $\beta$  exposure (**Fig. 3c-d**), with very long-chain saturated  
274 FFAs, C20:0, C22:0, and C19:0 being the most upregulated lipids at this time point (**Fig. 3e; S10a**).  
275 We also used novel gas-phase ion/ion chemistry (**Supplementary Results**) to structurally validate  
276 these highly-expressed saturated FFAs and confirmed that these specific saturated FFA structures  
277 were indeed directly synthesized in microglia with acute (1 hour) A $\beta$  exposure (**Fig. 3f, S11a-b**).  
278 Interestingly, the cells did not maintain their saturated FFA repertoire with prolonged A $\beta$  exposure  
279 (24 hours) and transitioned to TAGs, which were the most differentially-regulated lipid class at  
280 this time point, with TAG(52:3), TAG(54:3), and TAG(52:2) being the most upregulated species  
281 (**Fig. 3c-e; S10b**). In addition, MRM-profiling confirmed the increase of specific TAGs in A $\beta$ -  
282 treated microglia at the 24-hour time point compared to vehicle-treated microglia (**Fig. 3e,**  
283 **Supplementary Table ST10**). Furthermore, at 12 hours of A $\beta$  treatment, in addition to FFAs,  
284 cholesteryl esters (CEs) were the second most differentially-regulated lipid class, with very long  
285 chain CEs 20:2, 24:1, and 16:3 being the top upregulated CEs in microglia (**Fig. S10c-e**). Neutral  
286 lipids like TAGs and CEs form the core of LDs and are involved in energy storage and fatty acid  
287 metabolism in cells. Importantly, we quantified the total amount of upregulated FFAs, CEs, and  
288 TAGs as percent change of maximum ion intensity and verified that the reduction in FFAs from 1  
289 hour to 24 hours was followed by a concomitant increase in TAGs and CEs at 24 hours (**Fig. 3g**).  
290 This increase in core LD components suggested that the cells likely activated metabolic pathways  
291 towards LD formation. Taken together with acute treatment of A $\beta$  *ex vivo* (**Fig. 2b**), these results  
292 suggest a direct effect of A $\beta$ -aggregate exposure to promote LD formation in microglia. In contrast  
293 to the cellular lipidome, we did not find many lipids differentially regulated in the microglial  
294 conditioned media (secretory lipids) with A $\beta$  treatment - none at 1 hour, five at 12 hours, and one  
295 at 24 hours, respectively (**Supplementary Table ST7**). Given that both lipids and metabolites  
296 work together to activate cellular metabolic pathways, we also evaluated changes in microglial  
297 metabolite profiles with A $\beta$  exposure. Metabolites corresponding to alanine, aspartate, and  
298 glutamate metabolism, arginine biosynthesis, etc. were differentially regulated in microglia  
299 exposed to A $\beta$  (**Fig. S12, Supplementary Table ST11**). The metabolome of the microglial  
300 conditioned media exhibited pronounced differences following 12 and 24 hours of A $\beta$  exposure,

301 as seen in the PCA plots (**Fig. S13a**). Metabolites related to phenylalanine/tyrosine/tryptophan  
302 biosynthesis and glycine/serine/threonine biosynthesis pathways were differentially regulated in  
303 the microglial conditioned media due to A $\beta$  (**Fig. S13b-c, Supplementary Table ST12**). Taken  
304 together, the A $\beta$ -treated cellular and secreted metabolites overlapped with metabolic pathways in  
305 5xFAD compared to WT (**Fig. S2**). This suggests that A $\beta$  plays a direct role in upregulating TAGs,  
306 CEs and associated metabolites towards LD formation in AD. TAGs can be synthesized via two  
307 major pathways involving the conversion of FFAs to TAGs via several intermediates: 1) the  
308 glycerol phosphatase pathway or 2) the monoacylglycerol pathway (**Fig. 3h**)<sup>44</sup>. Since TAGs  
309 constitute the major neutral lipid core of LDs and are integral to their structure and function, we  
310 hypothesized that these pathways could be directly involved with the dramatic increase in TAGs  
311 following A $\beta$  exposure and likely also with LD formation in AD.

312

### 313 **The DGAT2 pathway is required for A $\beta$ -induced lipid droplet formation in AD microglia,** 314 **and inhibiting it rescues microglial phagocytic impairment in AD**

315

316 The diacylglycerol O-acyltransferase (DGAT) enzymes catalyze the final rate-determining step in  
317 the biosynthesis of TAGs. The DGAT2 enzyme is evolutionarily conserved across eukaryotes and  
318 has the predominant and ancient function for mediating TAG synthesis from fatty acids<sup>45</sup>. In  
319 addition, DGAT2 localizes around LDs, where it is required for LD-localized TAG  
320 synthesis<sup>46,47,48</sup>. Thus, we investigated whether DGAT2 is involved in the formation of A $\beta$ -induced  
321 LDs in microglia (**Fig. 4a**). We immunostained 5xFAD and WT brain tissues for DGAT2, LDs,  
322 A $\beta$  plaques, and microglia. We found that LD-laden microglia surrounding the A $\beta$  plaques  
323 expressed DGAT2 in 5xFAD tissue (**Fig. 4b**). Although we found *Dgat2* mRNA to be  
324 downregulated in 5xFAD microglia (**Fig. S14a**), we detected abundant DGAT2<sup>+</sup> microglia in the  
325 subiculum region of the 5xFAD brain (**Fig. S14b, Fig. 4c**).

326

327 Further, we used a DGAT2 inhibitor (D2i) to determine if reducing DGAT2 function affects  
328 microglial LD content and A $\beta$ -specific phagocytosis. Both WT and 5xFAD microglia showed a  
329 significant decrease in LDs upon D2i treatment *in vitro* (approx. 51% and 57% decreases,  
330 respectively, **Fig. 4d**). Further, there was a significant reduction in A $\beta$ -induced LDs with D2i  
331 treatment in WT microglia, thereby confirming that A $\beta$ -induced LD formation requires the  
332 DGAT2 pathway (**Fig. 4e-f, Fig. S15a**). Interestingly, we did not observe any significant  
333 differences in A $\beta$ -induced LDs with D2i treatment in 5xFAD microglia (**Fig. 4e-f, Fig. S15b**),  
334 similar to our results showing that A $\beta^{\text{pH}}$  treatment did not affect LD load in microglia isolated from  
335 5xFAD brains. Together, these results suggest an underlying A $\beta$ -induced LD saturation  
336 mechanism that allows DGAT2-mediated microglial LD formation in 5xFAD brain after chronic  
337 amyloid exposure *in vivo*, but prevents further LD accumulation upon additional *in vitro* A $\beta$   
338 exposure.

339

340 Next, we examined if D2i affected microglial phagocytic capacity. LD<sup>+</sup> microglia from WT brains  
341 showed a slight but non-significant increase in A $\beta^{\text{pH}}$  uptake with D2i compared to vehicle-treated  
342 cells (**Fig. 4g; Fig. S15c**). In contrast, LD<sup>+</sup> 5xFAD microglia showed a significant increase (1.41-  
343 fold) in A $\beta^{\text{pH}}$  uptake with D2i, which was similar to WT microglia in the presence of the inhibitor  
344 (**Fig. 4h; Fig. S15f**). Furthermore, the overall phagocytic capacity of 5xFAD microglia was  
345 improved with D2i treatment (**Fig. S15c**) compared to vehicle-treated cells, although again there  
346 was no significant difference between WT and 5xFAD microglia in the presence of the inhibitor



347 (Fig. S15d-e). Thus, the phagocytic dysfunction of LD-laden 5xFAD microglia was attenuated in  
348 the presence of D2i.

349  
350 Finally, we immunostained human AD and NS hippocampal tissue for A $\beta$  plaques, LD, DGAT2,  
351 and microglia. We found that plaque-associated microglia with increased LD content exhibited  
352 higher DGAT2 levels in AD brains compared to microglia from NS brains (Fig. 4i). In summary,  
353 we have discovered a novel A $\beta$ -mediated mechanism that promotes LD formation in microglia  
354 and identified the DGAT2 pathway as a novel target for therapeutic intervention to reduce  
355 phagocytic impairment of microglia and promote amyloid clearance or limit amyloid accumulation  
356 in the AD brain.

## 357 358 **DISCUSSION**

359  
360 Over the past two decades, a plethora of studies have revealed important microglial contributions  
361 to practically every neurological disorder or disease, with roles ranging from protective to  
362 harmful<sup>49</sup>. This collective body of work, together with an increasing number of microglial  
363 transcriptomic profiling studies, have underscored their multidimensional nature and their  
364 impressive capacity to react to any signal presented to them in an age-, sex-, disease stage-, and  
365 overall context-specific manner<sup>49</sup>. In this study, we showed that in the context of AD pathology,  
366 chronic exposure to A $\beta$  promotes specific metabolic changes in microglia that make them  
367 progressively accumulate LDs and render them incapable of contributing to A $\beta$  clearance. LD-  
368 laden microglia increase in numbers in an age- (5-7-month old), sex- (female), and brain region-  
369 specific manner (subiculum) in 5xFAD mice. These microglia are closely associated with A $\beta$   
370 plaques and have a unique morphology comprised of larger cell bodies and shorter processes in  
371 both 5xFAD and human AD brains. Importantly, LD-laden microglia exhibit reduced phagocytosis  
372 of A $\beta$ , a critical functional consequence of LD accumulation. Further, by challenging primary WT  
373 microglia directly with A $\beta$ , we discovered that even acute exposure to A $\beta$  was sufficient to shift  
374 their lipidomic composition towards reduced FFA and increased TAG content – a major  
375 component of LDs. We thus identified DGAT2, a key enzyme for the conversion of FFAs to TAGs,  
376 as an essential mediator of LD formation in microglia, and showed its increased abundance in  
377 5xFAD as well as human AD brain tissue. Crucially, pharmacological inhibition of DGAT2  
378 improved A $\beta$  phagocytosis, thus unraveling a new mechanism related to microglial dysfunction in  
379 AD.

380  
381 Recent studies focused on transcriptomic changes occurring in microglia at the single-cell level  
382 due to A $\beta$ . While such studies demonstrate the extent of glial heterogeneity in a specific  
383 environment based upon highly-abundant and actively-transcribed genes in each subpopulation,  
384 they do not fully capture the functional aspects of these cell populations, which are directly  
385 determined by bioactive molecules such as proteins, lipids, and other metabolites. We performed  
386 the first-ever large-scale lipidomic and metabolomic characterization of microglia with acute  
387 exposure to A $\beta$  *in vitro* and in chronic 5xFAD mice, profiling over 1300 lipid species and 700  
388 metabolites. Our data, which will be made available online ([http://microgliaomics-  
389 chopralab.appspot.com](http://microgliaomics-chopralab.appspot.com)), showed an increase in long-chain saturated FFAs (specifically C20:0,  
390 C19:0, and C22:0) upon 1h A $\beta$  exposure; however, longer treatment with A $\beta$  (24h) resulted in an  
391 abundance of long-chain TAGs. Previous studies showed that saturated FFAs are extremely  
392 cytotoxic to cells<sup>50</sup>. One way that cells overcome FFA-induced cytotoxicity is by metabolizing

393 them into TAGs<sup>51</sup>, which are integral components of the LD core. Microglia are thus able to  
394 circumvent lipid-mediated cytotoxicity via the production and accumulation of LDs. Interestingly,  
395 we recently found that reactive astrocytes secrete long-chain saturated FFAs that kill injured  
396 neurons and oligodendrocytes *in vitro* and *in vivo*<sup>37</sup>. While injured neurons and oligodendrocytes  
397 typically have a low capacity for consuming FFAs and sequestering them into LDs<sup>52</sup>, making them  
398 more vulnerable to lipid-induced cytotoxicity in chronic inflammation<sup>53,54</sup>, our findings  
399 demonstrate that microglia can metabolize these toxic molecules into TAGs. This response could  
400 be one way that microglia protect themselves and neurons from the cytotoxic environment of the  
401 chronically-inflamed AD brain; however, it seems to affect their own morphology and functional  
402 state as well.

403  
404 Changes in microglial morphology have been described in numerous inflammatory, degenerative,  
405 and injury paradigms as indications of changes in their overall state and reactivity. In our study,  
406 LD-laden microglia were closely associated with A $\beta$  plaques and exhibited shorter processes and  
407 larger cell bodies in both 5xFAD mouse and human AD brains. These unique LD-laden microglia  
408 were primarily located in the hippocampal subicular regions of 5xFAD mice and in postmortem  
409 human hippocampi from AD patients, which are the sites of the earliest atrophy seen during AD  
410 pathogenesis<sup>55</sup>. In addition to the protective roles of some lipids<sup>56</sup>, their accumulation is also linked  
411 to cellular senescence<sup>57</sup>. For example, in an obesity mouse model, senescent glia were found to  
412 accumulate LDs, which contributed to impaired neurogenesis<sup>58</sup>. Whether these LD-laden  
413 microglia are ultimately detrimental or protective to the tissue due to their dysfunctional, hyper-  
414 reactive, and/or senescent state in the context of chronic inflammation remains elusive and may  
415 well depend upon the extent or nature of metabolic changes that microglia experience in the  
416 context of different challenges. Overall, these observations open new avenues for exploring the  
417 functional roles of plaque-associated LD-laden microglia and their involvement in AD  
418 progression, as well as the functional significance of LD accumulation in microglia in other  
419 neuropathologies.

420  
421 Phagocytosis is a major innate immune mechanism contributing to A $\beta$  clearance, and its failure  
422 favors A $\beta$  accumulation in the brain. Late-onset AD, which accounts for ~95% of AD cases, is  
423 associated with impaired A $\beta$  clearance<sup>59</sup>. Microglia directly engulf and degrade A $\beta$ <sup>60,61</sup>, but their  
424 capacity for efficient phagocytosis declines with aging, chronic exposure to A $\beta$ , and during  
425 sustained inflammation in the AD brain<sup>62,16,17</sup>. Indeed, acute exposure of primary microglia to A $\beta$   
426 increased their inflammatory cytokine secretion and phagocytic performance, while chronic  
427 exposure reduced phagocytosis and induced immune tolerance as well as a metabolic shift from  
428 oxidative phosphorylation to glycolysis<sup>63</sup>. Interestingly, restoration of microglial phagocytosis  
429 improved cognitive function in aged mice and promoted a homeostatic microglial transcriptional  
430 signature<sup>64</sup>.

431  
432 Plaque-associated microglia have direct access to remove aggregated amyloid through  
433 phagocytosis. Prior studies have proposed that these cells are compacting amyloid plaques through  
434 phagocytic receptors such as TREM2<sup>14</sup>, (a receptor expressed on myeloid cells, for which gene  
435 variants have been associated to increased AD risk)<sup>14,8</sup>, Axl, and Mer<sup>65</sup>. Genetic deletion of any of  
436 these receptors in mouse models of AD resulted in less compact/more diffuse plaques, and was  
437 associated with increased neuritic dystrophy around A $\beta$  deposits<sup>14,65</sup>. These studies suggested that  
438 microglia build a neuroprotective barrier that limits plaque growth through their phagocytic

439 receptors, and further proposed microglia as plaque “compactors” that uptake A $\beta$  and condense it  
440 in their lysosomes to eventually re-deposit it as dense core plaques<sup>65</sup>. We found that plaque–  
441 associated microglia progressively accumulated more LDs, and that cells with increased LD  
442 content were less capable of A $\beta$  phagocytosis. LD-laden microglia found in the aged brain also  
443 demonstrated phagocytic deficits<sup>20</sup>, but the molecular mechanisms linking the appearance of these  
444 organelles with functional deficits in microglia were unclear. We discovered that A $\beta$  alone can  
445 shift the metabolic equilibrium within microglia to convert FFAs to TAGs, one of the main  
446 components of LDs. To decipher if this catalytic conversion that is known to contribute to LD  
447 formation<sup>51,66</sup> is also responsible for microglial dysfunction, we blocked DGAT2, a key enzyme  
448 for this pathway. Although we found the DGAT2 mRNA significantly decreased in 5xFAD  
449 microglia, the protein was abundant in plaque-associated LD-laden microglia in both mouse and  
450 human AD brains, underscoring how relying solely on transcript levels might mask important  
451 ongoing cellular functions. Importantly, blocking DGAT2 was sufficient to restore phagocytosis  
452 in 5xFAD microglia, suggesting that phagocytic dysfunction is the consequence, rather than the  
453 cause, of chronic LD accumulation and pointing towards DGAT2 as a promising target to restore  
454 microglia-mediated A $\beta$  clearance. In support of our findings, a study in macrophages showed that  
455 their phagocytic function is also dependent upon the availability of FFAs that are generated upon  
456 degradation of LDs, suggesting that LD accumulation somehow limits the phagocytic capacity of  
457 all tissue-resident macrophages<sup>67</sup>.

458  
459 Delineating the molecular mechanisms that drive LD accumulation and their downstream impact  
460 on cellular functions and overall tissue health is paramount for the design of novel therapeutic  
461 strategies for AD and other neurodegenerative diseases. Here, we have identified one such  
462 druggable molecule that regulates TAG formation and LD accumulation in microglia while also  
463 directly impacting their function. Unlike other acyltransferases, such as GPAT and AGPAT, that  
464 are upstream and involved in the glycerol phosphatase pathway, the activity of DGAT is the direct  
465 rate-limiting step for the biosynthesis of TAGs<sup>44</sup>. Therefore, since inhibiting DGAT2 alone was  
466 sufficient to improve microglial phagocytosis of A $\beta$ , targeting DGAT2 emerges as a prime target  
467 for regulating the phagocytic activity of LD-laden microglia compared to other candidate enzymes.  
468 Our study thus provides proof-of-principle for pursuing DGAT2 inhibition as an ideal strategy to  
469 promote the protective role of microglia in AD, possibly in other neurodegenerative diseases with  
470 excessive protein aggregation and LD deposition as well.

471  
472

## 473 MAIN REFERENCES

- 474
- 475 1. Serrano-Pozo, A., Frosch, M. P., Masliah, E. & Hyman, B. T. Neuropathological  
476 alterations in Alzheimer disease. *Cold Spring Harb. Perspect. Med.* **1**, (2011).
  - 477 2. Plascencia-Villa, G. & Perry, G. Status and future directions of clinical trials in  
478 Alzheimer’s disease. in *International Review of Neurobiology* vol. 154 3–50 (2020).
  - 479 3. Morris, G. P., Clark, I. A. & Vissel, B. Inconsistencies and Controversies Surrounding the  
480 Amyloid Hypothesis of Alzheimer’s Disease. *Acta Neuropathologica Communications*  
481 vol. 2 1–21 (2014).
  - 482 4. Bertram, L. *et al.* Genome-wide Association Analysis Reveals Putative Alzheimer’s  
483 Disease Susceptibility Loci in Addition to APOE. *Am. J. Hum. Genet.* **83**, 623–632  
484 (2008).

- 485 5. Hollingworth, P. *et al.* Common variants at ABCA7, MS4A6A/MS4A4E, EPHA1, CD33  
486 and CD2AP are associated with Alzheimer's disease. *Nat. Genet.* **43**, 429–436 (2011).
- 487 6. Naj, A. C. *et al.* Common variants at MS4A4/MS4A6E, CD2AP, CD33 and EPHA1 are  
488 associated with late-onset Alzheimer's disease. *Nat. Genet.* **43**, 436–443 (2011).
- 489 7. Guerreiro, R. *et al.* TREM2 Variants in Alzheimer's Disease. *N. Engl. J. Med.* **368**, 117–  
490 127 (2013).
- 491 8. Jonsson, T. *et al.* Variant of TREM2 Associated with the Risk of Alzheimer's Disease. *N. Engl. J. Med.* **368**, 107–116 (2013).
- 492 9. Keren-Shaul, H. *et al.* A Unique Microglia Type Associated with Restricting  
493 Development of Alzheimer's Disease. *Cell* **169**, 1276–1290.e17 (2017).
- 494 10. Krasemann, S. *et al.* The TREM2-APOE Pathway Drives the Transcriptional Phenotype  
495 of Dysfunctional Microglia in Neurodegenerative Diseases. *Immunity* **47**, 566–581.e9  
496 (2017).
- 497 11. Nott, A. *et al.* Brain cell type-specific enhancer-promoter interactome maps and disease-  
498 risk association. *Science (80-. )*. **366**, 1134–1139 (2019).
- 500 12. Wyss-Coray, T. & Rogers, J. Inflammation in Alzheimer disease-A brief review of the  
501 basic science and clinical literature. *Cold Spring Harb. Perspect. Med.* **2**, a006346 (2012).
- 502 13. Condello, C., Yuan, P., Schain, A. & Grutzendler, J. Microglia constitute a barrier that  
503 prevents neurotoxic protofibrillar A $\beta$ 42 hotspots around plaques. *Nat. Commun.* **6**, 1–14  
504 (2015).
- 505 14. Yuan, P. *et al.* TREM2 Haplodeficiency in Mice and Humans Impairs the Microglia  
506 Barrier Function Leading to Decreased Amyloid Compaction and Severe Axonal  
507 Dystrophy. *Neuron* **90**, 724–739 (2016).
- 508 15. Heneka, M. T. *et al.* Neuroinflammation in Alzheimer's disease. *Lancet Neurol.* **14**, 388–  
509 405 (2015).
- 510 16. Hickman, S. E., Allison, E. K. & El Khoury, J. Microglial dysfunction and defective  $\beta$ -  
511 amyloid clearance pathways in aging alzheimer's disease mice. *J. Neurosci.* **28**, 8354–  
512 8360 (2008).
- 513 17. Krabbe, G. *et al.* Functional Impairment of Microglia Coincides with Beta-Amyloid  
514 Deposition in Mice with Alzheimer-Like Pathology. *PLoS One* **8**, (2013).
- 515 18. Leyrolle, Q., Layé, S. & Nadjar, A. Direct and indirect effects of lipids on microglia  
516 function. *Neuroscience Letters* vol. 708 134–348 (2019).
- 517 19. Tremblay, M. E. *et al.* Remodeling of lipid bodies by docosahexaenoic acid in activated  
518 microglial cells. *J. Neuroinflammation* **13**, 1–18 (2016).
- 519 20. Marschallinger, J. *et al.* Lipid-droplet-accumulating microglia represent a dysfunctional  
520 and proinflammatory state in the aging brain. *Nat. Neurosci.* **23**, 194–208 (2020).
- 521 21. Chausse, B., Kakimoto, P. A. & Kann, O. Microglia and lipids: how metabolism controls  
522 brain innate immunity. *Seminars in Cell and Developmental Biology* vol. 112 137–144  
523 (2021).
- 524 22. Bourre, J. M. Brain lipids and ageing. in *Food for the Ageing Population: A volume in*  
525 *Woodhead Publishing Series in Food Science, Technology and Nutrition* 219–251 (2008).  
526 doi:10.1533/9781845695484.2.219.
- 527 23. Cantuti-Castelvetri, L. *et al.* Defective cholesterol clearance limits remyelination in the  
528 aged central nervous system. *Science (80-. )*. **359**, 684–688 (2018).
- 529 24. Wong, M. W. *et al.* Dysregulation of lipids in Alzheimer's disease and their role as  
530 potential biomarkers. *Alzheimer's and Dementia* vol. 13 810–827 (2017).



- 531 25. Tsai, A. P. *et al.* INPP5D expression is associated with risk for Alzheimer’s disease and  
532 induced by plaque-associated microglia. *Neurobiol. Dis.* **153**, 105303 (2021).
- 533 26. Wang, Y. *et al.* TREM2 lipid sensing sustains the microglial response in an Alzheimer’s  
534 disease model. *Cell* **160**, 1061–1071 (2015).
- 535 27. Fitz, N. F. *et al.* Phospholipids of APOE lipoproteins activate microglia in an isoform-  
536 specific manner in preclinical models of Alzheimer’s disease. *Nat. Commun.* **12**, (2021).
- 537 28. Stelzmann, R. A., Norman Schnitzlein, H. & Reed Murtagh, F. An english translation of  
538 alzheimer’s 1907 paper, “über eine eigenartige erkankung der hirnrinde”. *Clin. Anat.* **8**,  
539 429–431 (1995).
- 540 29. Farese, R. V. & Walther, T. C. Lipid Droplets Finally Get a Little R-E-S-P-E-C-T. *Cell*  
541 vol. 139 855–860 (2009).
- 542 30. Fujimoto, T. & Parton, R. G. Not Just Fat: The Structure and Function of the Lipid  
543 Droplet. *Cold Spring Harb. Perspect. Biol.* **3**, 1–17 (2011).
- 544 31. Khatchadourian, A., Bourque, S. D., Richard, V. R., Titorenko, V. I. & Maysinger, D.  
545 Dynamics and regulation of lipid droplet formation in lipopolysaccharide (LPS)-  
546 stimulated microglia. *Biochim. Biophys. Acta* **1821**, 607–17 (2012).
- 547 32. Urso, C. J. & Zhou, H. Palmitic acid lipotoxicity in microglia cells is ameliorated by  
548 unsaturated fatty acids. *Int. J. Mol. Sci.* **22**, 90–93 (2021).
- 549 33. Claes, C. *et al.* Plaque-associated human microglia accumulate lipid droplets in a chimeric  
550 model of Alzheimer’s disease. *Mol. Neurodegener.* **16**, 50 (2021).
- 551 34. Oakley, H. *et al.* Intraneuronal  $\beta$ -amyloid aggregates, neurodegeneration, and neuron loss  
552 in transgenic mice with five familial Alzheimer’s disease mutations: Potential factors in  
553 amyloid plaque formation. *J. Neurosci.* **26**, 10129–10140 (2006).
- 554 35. Oblak, A. L. *et al.* Comprehensive Evaluation of the 5XFAD Mouse Model for Preclinical  
555 Testing Applications: A MODEL-AD Study. *Front. Aging Neurosci.* **13**, (2021).
- 556 36. Merlini, M. *et al.* Fibrinogen Induces Microglia-Mediated Spine Elimination and  
557 Cognitive Impairment in an Alzheimer’s Disease Model. *Neuron* **101**, 1099-1108.e6  
558 (2019).
- 559 37. Guttenplan, K. A. *et al.* Neurotoxic reactive astrocytes induce cell death via saturated  
560 lipids. *Nature* **599**, 102–107 (2021).
- 561 38. Yu, Y., Ramachandran, P. V. & Wang, M. C. Shedding new light on lipid functions with  
562 CARS and SRS microscopy. *Biochim. Biophys. Acta - Mol. Cell Biol. Lipids* **1841**, 1120–  
563 1129 (2014).
- 564 39. Deture, M. A. & Dickson, D. W. The neuropathological diagnosis of Alzheimer’s disease.  
565 *Molecular Neurodegeneration* (2019) doi:10.1186/s13024-019-0333-5.
- 566 40. Itagaki, S., McGeer, P. L., Akiyama, H., Zhu, S. & Selkoe, D. Relationship of microglia  
567 and astrocytes to amyloid deposits of Alzheimer disease. *J. Neuroimmunol.* **24**, 173–182  
568 (1989).
- 569 41. Baron, R., Babcock, A. A., Nemirovsky, A., Finsen, B. & Monsonego, A. Accelerated  
570 microglial pathology is associated with A $\beta$  plaques in mouse models of Alzheimer’s  
571 disease. *Aging Cell* **13**, 584–595 (2014).
- 572 42. Orre, M. *et al.* Isolation of glia from Alzheimer’s mice reveals inflammation  
573 and dysfunction. *Neurobiol. Aging* **35**, 2746–2760 (2014).
- 574 43. Prakash, P. *et al.* Monitoring phagocytic uptake of amyloid  $\beta$  into glial cell lysosomes in  
575 real time. *Chem. Sci.* **12**, 10901–10918 (2021).
- 576 44. Yen, C.-L. E., Stone, S. J., Koliwad, S., Harris, C. & Farese, R. V. Thematic review



- 577 series: glycerolipids. DGAT enzymes and triacylglycerol biosynthesis. *J. Lipid Res.* **49**,  
578 2283–301 (2008).
- 579 45. Chitraju, C., Walther, T. C. & Farese, R. V. The triglyceride synthesis enzymes DGAT1  
580 and DGAT2 have distinct and overlapping functions in adipocytes. *J. Lipid Res.* **60**, 1112–  
581 1120 (2019).
- 582 46. Wilfling, F. *et al.* Triacylglycerol synthesis enzymes mediate lipid droplet growth by  
583 relocalizing from the ER to lipid droplets. *Dev. Cell* **24**, 384–399 (2013).
- 584 47. Kuerschner, L., Moessinger, C. & Thiele, C. Imaging of lipid biosynthesis: How a neutral  
585 lipid enters lipid droplets. *Traffic* **9**, 338–352 (2008).
- 586 48. Stone, S. J. *et al.* The endoplasmic reticulum enzyme DGAT2 is found in mitochondria-  
587 associated membranes and has a mitochondrial targeting signal that promotes its  
588 association with mitochondria. *J. Biol. Chem.* **284**, 5352–5361 (2009).
- 589 49. Uriarte Huarte, O., Richart, L., Mittelbronn, M. & Michelucci, A. Microglia in Health and  
590 Disease: The Strength to Be Diverse and Reactive. *Frontiers in Cellular Neuroscience*  
591 vol. 15 (2021).
- 592 50. Gordon, G. B. Saturated free fatty acid toxicity. II. Lipid accumulation, ultrastructural  
593 alterations, and toxicity in mammalian cells in culture. *Exp. Mol. Pathol.* **27**, 262–276  
594 (1977).
- 595 51. Listenberger, L. L. *et al.* Triglyceride accumulation protects against fatty acid-induced  
596 lipotoxicity. *Proc. Natl. Acad. Sci.* **100**, 3077–3082 (2003).
- 597 52. Schönfeld, P. & Reiser, G. Why does brain metabolism not favor burning of fatty acids to  
598 provide energy-Reflections on disadvantages of the use of free fatty acids as fuel for brain.  
599 *Journal of Cerebral Blood Flow and Metabolism* vol. 33 1493–1499 (2013).
- 600 53. Sultana, R., Perluigi, M. & Butterfield, D. A. Lipid peroxidation triggers  
601 neurodegeneration: A redox proteomics view into the Alzheimer disease brain. *Free*  
602 *Radical Biology and Medicine* vol. 62 157–169 (2013).
- 603 54. Reynolds, I. J. & Hastings, T. G. Glutamate induces the production of reactive oxygen  
604 species in cultured forebrain neurons following NMDA receptor activation. *J. Neurosci.*  
605 **15**, 3318–3327 (1995).
- 606 55. Carlesimo, G. A. *et al.* Atrophy of presubiculum and subiculum is the earliest  
607 hippocampal anatomical marker of Alzheimer’s disease. *Alzheimer’s Dement.*  
608 (*Amsterdam, Netherlands*) **1**, 24–32 (2015).
- 609 56. Li, N., Lizardo, D. Y. & Atilla-Gokcumen, G. E. Specific Triacylglycerols Accumulate  
610 via Increased Lipogenesis during 5-FU-Induced Apoptosis. *ACS Chem. Biol.* **11**, 2583–  
611 2587 (2016).
- 612 57. Lizardo, D. Y., Lin, Y. L., Gokcumen, O. & Atilla-Gokcumen, G. E. Regulation of lipids  
613 is central to replicative senescence. *Mol. Biosyst.* **13**, 498–509 (2017).
- 614 58. Ogrodnik, M. *et al.* Obesity-Induced Cellular Senescence Drives Anxiety and Impairs  
615 Neurogenesis. *Cell Metab.* **29**, 1061-1077.e8 (2019).
- 616 59. Mawuenyega, K. G. *et al.* Decreased clearance of CNS  $\beta$ -amyloid in Alzheimer’s disease.  
617 *Science (80-. )*. **330**, 1774 (2010).
- 618 60. Liu, Z., Condello, C., Schain, A., Harb, R. & Grutzendler, J. CX3CR1 in microglia  
619 regulates brain amyloid deposition through selective protofibrillar amyloid- $\beta$   
620 phagocytosis. *J. Neurosci.* **30**, 17091–17101 (2010).
- 621 61. Mandrekar, S. *et al.* Microglia mediate the clearance of soluble  $a\beta$  through fluid phase  
622 macropinocytosis. *J. Neurosci.* **29**, 4252–4262 (2009).

- 623 62. Njie, e. M. G. *et al.* Ex vivo cultures of microglia from young and aged rodent brain  
624 reveal age-related changes in microglial function. *Neurobiol. Aging* **33**, 195.e1-195.e12  
625 (2012).
- 626 63. Baik, S. H. *et al.* A Breakdown in Metabolic Reprogramming Causes Microglia  
627 Dysfunction in Alzheimer’s Disease. *Cell Metab.* **30**, 493-507.e6 (2019).
- 628 64. Pluvinage, J. V. *et al.* CD22 blockade restores homeostatic microglial phagocytosis in  
629 ageing brains. *Nature* **568**, 187–192 (2019).
- 630 65. Huang, Y. *et al.* Microglia use TAM receptors to detect and engulf amyloid  $\beta$  plaques.  
631 *Nat. Immunol.* **22**, 586–594 (2021).
- 632 66. Castoldi, A. *et al.* Triacylglycerol synthesis enhances macrophage inflammatory function.  
633 *Nat. Commun.* **11**, (2020).
- 634 67. Chandak, P. G. *et al.* Efficient phagocytosis requires triacylglycerol hydrolysis by adipose  
635 triglyceride lipase. *J. Biol. Chem.* **285**, 20192–20201 (2010).
- 636 68. Bohlen, C. J., Bennett, F. C. & Bennett, M. L. Isolation and Culture of Microglia. *Curr.*  
637 *Protoc. Immunol.* **125**, e70 (2019).
- 638 69. Prakash, P., Lantz, T. C., Jethava, K. P. & Chopra, G. Rapid, Refined, and Robust Method  
639 for Expression, Purification, and Characterization of Recombinant Human Amyloid beta  
640 1-42. *Methods Protoc.* **2**, 48 (2019).
- 641 70. Bligh E. G. and Dyer W. J. A Rapid Method Of Total Lipid Extraction and Purification.  
642 *Can. J. Biochem. Physiol.* **37**, 911–917 (1959).
- 643 71. Xie, Z., Ferreira, C. R., Virequ, A. A. & Cooks, R. G. Multiple reaction monitoring  
644 profiling (MRM profiling): Small molecule exploratory analysis guided by chemical  
645 functionality. *Chem. Phys. Lipids* **235**, 105048 (2021).
- 646 72. Cordeiro, F. B. *et al.* Multiple reaction monitoring (MRM)-profiling for biomarker  
647 discovery applied to human polycystic ovarian syndrome. *Rapid Commun. Mass*  
648 *Spectrom.* **31**, 1462–1470 (2017).
- 649 73. de Lima, C. B. *et al.* Comprehensive lipid profiling of early stage oocytes and embryos by  
650 MRM profiling. *J. Mass Spectrom.* **53**, 1247–1252 (2018).
- 651 74. Fahy, E. *et al.* Update of the LIPID MAPS comprehensive classification system for lipids.  
652 *J. Lipid Res.* **50**, S9–S14 (2009).
- 653 75. Guttenplan, K. A. *et al.* Neurotoxic reactive astrocytes induce cell death via saturated  
654 lipids. *Nature* 1–6 (2021).
- 655 76. Robinson, M. D., McCarthy, D. J. & Smyth, G. K. edgeR: A Bioconductor package for  
656 differential expression analysis of digital gene expression data. *Bioinformatics* **26**, 139–  
657 140 (2009).
- 658 77. McCarthy, D. J., Chen, Y. & Smyth, G. K. Differential expression analysis of multifactor  
659 RNA-Seq experiments with respect to biological variation. *Nucleic Acids Res.* **40**, 4288–  
660 4297 (2012).
- 661 78. Benjamini, Y. & Hochberg, Y. Controlling the False Discovery Rate: A Practical and  
662 Powerful Approach to Multiple Testing. *J. R. Stat. Soc. Ser. B* **57**, 289–300 (1995).
- 663 79. Randolph, C. E., Foreman, D. J., Blanksby, S. J. & McLuckey, S. A. Generating Fatty  
664 Acid Profiles in the Gas Phase: Fatty Acid Identification and Relative Quantitation Using  
665 Ion/Ion Charge Inversion Chemistry. *Anal. Chem.* **91**, 9032–9040 (2019).
- 666 80. Randolph, C. E., Marshall, D. L., Blanksby, S. J. & McLuckey, S. A. Charge-switch  
667 derivatization of fatty acid esters of hydroxy fatty acids via gas-phase ion/ion reactions.  
668 *Anal. Chim. Acta* **1129**, 31–39 (2020).

- 669 81. Xia, Y., Wu, J., McLuckey, S. A., Londry, F. A. & Hager, J. W. Mutual storage mode  
670 ion/ion reactions in a hybrid linear ion trap. *J. Am. Soc. Mass Spectrom.* **16**, 71–81 (2005).  
671 82. Xia, Y., Liang, X. & McLuckey, S. A. Pulsed dual electrospray ionization for ion/ion  
672 reactions. *J. Am. Soc. Mass Spectrom.* **16**, 1750–1756 (2005).  
673 83. Londry, F. A. & Hager, J. W. Mass selective axial ion ejection from a linear quadrupole  
674 ion trap. *J. Am. Soc. Mass Spectrom.* *2003 1410* **14**, 1130–1147 (2003).  
675 84. Xia, J., Wishart, D. S. & Valencia, A. MetPA: a web-based metabolomics tool for  
676 pathway analysis and visualization. *Bioinformatics* **26**, 2342–2344 (2010).  
677 85. Randolph, C. E., Foreman, D. J., Betancourt, S. K., Blanksby, S. J. & McLuckey, S. A.  
678 Gas-Phase Ion/Ion Reactions Involving Tris-Phenanthroline Alkaline Earth Metal  
679 Complexes as Charge Inversion Reagents for the Identification of Fatty Acids. *Anal.*  
680 *Chem.* (2018) doi:10.1021/acs.analchem.8b03441.  
681 86. Randolph, C. E., Shenault, D. M., Blanksby, S. J. & Mcluckey, S. A. Localization of  
682 Carbon-Carbon Double Bond and Cyclopropane Sites in Cardiolipins via Gas-Phase  
683 Charge Inversion Reactions. *J. Am. Soc. Mass Spectrom.* (2021)  
684 doi:10.1021/jasms.0c00348.  
685  
686

#### 687 DATA AVAILABILITY

688 Supplemental tables, figures, and associated content is available with the manuscript. All data  
689 analysis is available on GitHub ([https://github.com/chopralab/microglia\\_omics](https://github.com/chopralab/microglia_omics)). A web  
690 application has been developed for exploring lipid and metabolite mass spectrometry data that will  
691 be publicly available at <http://microgliaomics-chopralab.appspot.com> (for review, username:  
692 admin, password: Review). The accession information for raw lipid and metabolite mass  
693 spectrometry data is MassIVE MSV000089458:  
694 <https://massive.ucsd.edu/ProteoSAFe/dataset.jsp?task=0f7bd7cfaf504869bfac786e4184105e>.  
695

#### 696 CODE AVAILABILITY

697 All of the analysis codes for the lipidomics and metabolomics experiments are available on Github  
698 at [https://github.com/chopralab/microglia\\_omics](https://github.com/chopralab/microglia_omics).  
699

#### 700 ACKNOWLEDGEMENTS

701 We thank the following individuals for their input and assistance: Ms. Anisa Dunham for help with  
702 animal breeding and maintenance, as well as PCR experiments; Dr. Christina Ferreira at the Purdue  
703 Metabolomics Facility for assistance with lipid mass spectrometry; Dr. Scott McLuckey for access  
704 to a modified Sciex QTRAP 4000 triple quadrupole/linear ion trap mass spectrometer to perform  
705 ion/ion reactions; Dr. Shane Tichy for his support, and Agilent Technologies for their gift of the  
706 Triple Quadrupole LC/MS to the Chopra Laboratory; Dr. J. Paul Robinson and Ms. Kathy Ragheb  
707 at the Purdue University Cytometry Laboratories for flow cytometry services; Dr. Chris Nelson in  
708 the Department of Neurosciences of the Lerner Research Institute of Cleveland Clinic for editorial  
709 assistance. This work was supported by the United States Department of Defense USAMRAA  
710 award W81XWH2010665 through the Peer Reviewed Alzheimer's Research Program, NIH  
711 National Institute of Mental Health award R01MH128866 and National Center for Advancing  
712 Translational Sciences ASPIRE awards to G.C.; the NIH National Institute for Neurological  
713 Disorders and Stroke award R01NS112526, and NIH National Institute on Alcohol Abuse and  
714 Alcoholism award P50AA024333 to D.D. Additional support, in part, by the Stark Neurosciences

715 Research Institute, the Indiana Alzheimer Disease Center, Eli Lilly and Company; the Indiana  
716 Clinical and Translational Sciences Institute grant UL1TR002529 from the NIH, National Center  
717 for Advancing Translational Sciences. We also acknowledge the Pathology Research Core in the  
718 Robert J. Tomsich Pathology and Laboratory Medicine Institute of Cleveland Clinic for their  
719 human tissue services; the Clinical Core of Cleveland Clinic's Northern Ohio Alcohol Center  
720 funded by NIH grant P50AA024333; the Purdue University Center for Cancer Research funded  
721 by NIH grant P30 CA023168. We also thank current and prior members of the Davalos and Chopra  
722 laboratories for critical discussions and day-to-day assistance with experiments included in this  
723 manuscript. The content is solely the responsibility of the authors and does not necessarily  
724 represent the official views of the National Institutes of Health. Select illustrations in figures were  
725 made using BioRender.

726

727

#### 728 **DECLARATION OF INTERESTS**

729 G.C. is the Director of the Merck-Purdue Center for Measurement Science funded by Merck Sharp  
730 & Dohme, a subsidiary of Merck and a co-founder of Meditati Inc., a startup developing smart  
731 drugs for mental health indications. The remaining authors declare no competing interests.

732



733 **FIGURES**  
734

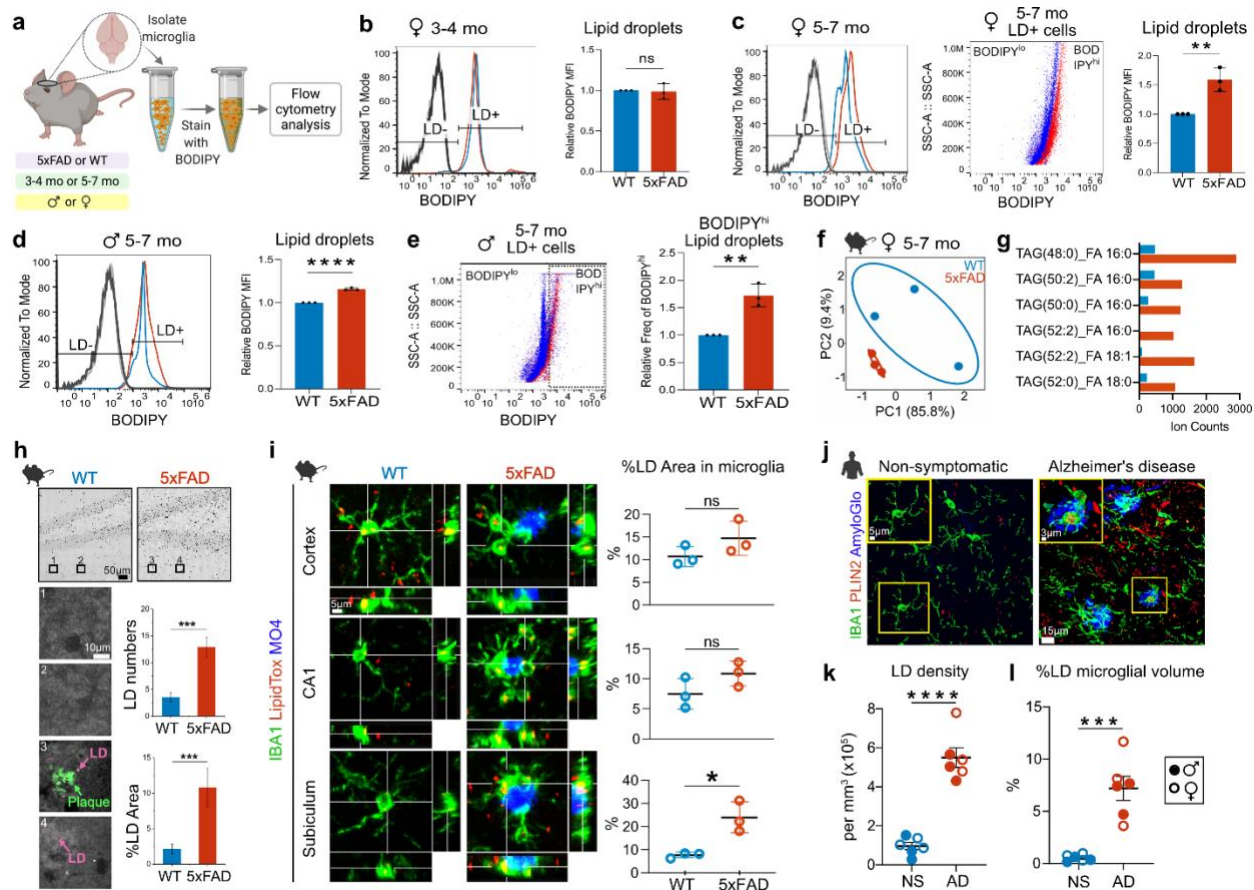

735  
736  
737

738 **Fig. 1: LD abundance in microglia is age-, sex-, and region-dependent in the AD brain**  
739 **a.** Experimental design for labeling and quantifying LDs in acutely-isolated microglia from  
740 5xFAD and WT male and female mice at 3-4 or 5-7 months old. LDs were labeled with BODIPY  
741 dye and quantified using flow cytometry. **b.** Representative graph (left) and quantification (right)  
742 of median fluorescence intensity (MFI) of LDs in live microglia (CD11b<sup>+</sup>DAPI<sup>+</sup>) from 3-4-month-  
743 old female mice show no increase in LD content in cells from 5xFAD (red line and bar) compared  
744 to WT animals (blue line and bar). Data represent mean  $\pm$  SD. Unpaired t-test, N=3 separate  
745 experiments, each including one WT and one 5xFAD mouse. **c.** Quantification of LDs in microglia  
746 from 5-7-month-old female mice shows an increase (shift towards higher BODIPY fluores-  
747 cence intensity) in LDs from 5xFAD (red) compared to WT (blue) microglia. Dot plot shows a  
748 homogeneous population of BODIPY<sup>hi</sup> microglia within the LD<sup>+</sup> cell subset from 5xFAD mice  
749 (red dots) compared to microglia from WT mice (blue dots); \*\**P* = 0.0068. **d.** Quantification of  
750 LDs in microglia from 5-7-month-old male mice shows an increase in LD content in 5xFAD  
751 microglia compared to WT; \*\*\*\**P* = 0.00003. **e.** Comparison between BODIPY<sup>hi</sup> and BODIPY<sup>lo</sup>  
752 cell populations within LD<sup>+</sup> microglia from 5-7-month-old male mice shows more BODIPY<sup>hi</sup>  
753 microglial cells in 5xFAD mice (red dots) compared to microglia from WT mice (blue dots).  
754 Quantification shows the relative frequency of microglia containing LDs in the BODIPY<sup>hi</sup> gate in  
755 5xFAD and WT microglia; \*\**P* = 0.0039. For c-e: Data represent mean  $\pm$  SD. Unpaired t-test, N=3



756 separate experiments, each including two WT and two 5xFAD mice. **f.** Principal component  
757 analysis (PCA) plot depicts a clear separation based upon variation in microglial lipidomes from  
758 5-7-month-old WT and 5xFAD female mice. **g.** Graph shows the identification and relative  
759 amounts of specific TAG lipid species that were increased in microglia from 5-7-month-old female  
760 5xFAD mice compared to cells from WT controls. For **f-g:** N=3 separate experiments, each from  
761 one WT and one 5xFAD mouse. **h.** Label-free SRS imaging of LDs and A $\beta$  plaques in 5xFAD and  
762 WT brain hippocampal slices. Increased LDs were observed and quantified in 5xFAD brain  
763 sections, often associated with A $\beta$  plaques (3, 4), compared to WT tissues (1, 2). Twelve areas  
764 were quantified for each group (WT and 5xFAD), from the same brain section. Unpaired t-test,  
765 N=2 separate experiments, each including one WT and one 5xFAD mouse. **i.** Immunofluorescence  
766 of IBA1, and counter-staining for LDs (LipidTox), and A $\beta$  plaques (Methoxy XO4; MO4) in the  
767 cortex, CA1, and subiculum regions from 5xFAD and WT mice. Quantification showed a trend  
768 towards increased % LD area within microglia in the cortex and CA1 regions, which was  
769 statistically significant in the subiculum (\* $P=0.0147$ ) from 5xFAD compared to WT mice. Data  
770 represent mean  $\pm$  SD. Unpaired t-test, N=3 separate experiments, each including one WT and one  
771 5xFAD mouse. **j.** Detection of lipid droplets in human hippocampal formalin-fixed paraffin-  
772 embedded (FFPE) tissue from AD and non-symptomatic (NS) cases. Immunofluorescence was  
773 performed on 15 $\mu$ m sections for the detection of lipid droplets (PLIN2), A $\beta$  plaques (AmyloGlo),  
774 and microglia (IBA1). Representative images show an increase in the density of PLIN2<sup>+</sup> LDs in  
775 AD compared to non-symptomatic cases. Higher magnification inserts show an increase of LDs  
776 in microglia from AD patients compared to NS individuals. **k.** Quantification of the number of  
777 PLIN2<sup>+</sup> LDs per mm<sup>3</sup> of imaged volume (LD density) shows a significant increase in AD  
778 compared to NS cases; \*\*\*\* $P=0.000007$ . **l.** Quantification of percentage of microglial volume  
779 occupied by LDs over the total microglial volume per imaged volume of hippocampal tissue shows  
780 an increase in AD compared to NS cases; \*\*\* $P=0.0002$ . For **k, l:** quantification was performed in  
781 3D reconstructed confocal z-stacks using Imaris; Data represent mean  $\pm$  SEM. Unpaired t-test,  
782 N=6 (3 males and 3 females) per group.  
783

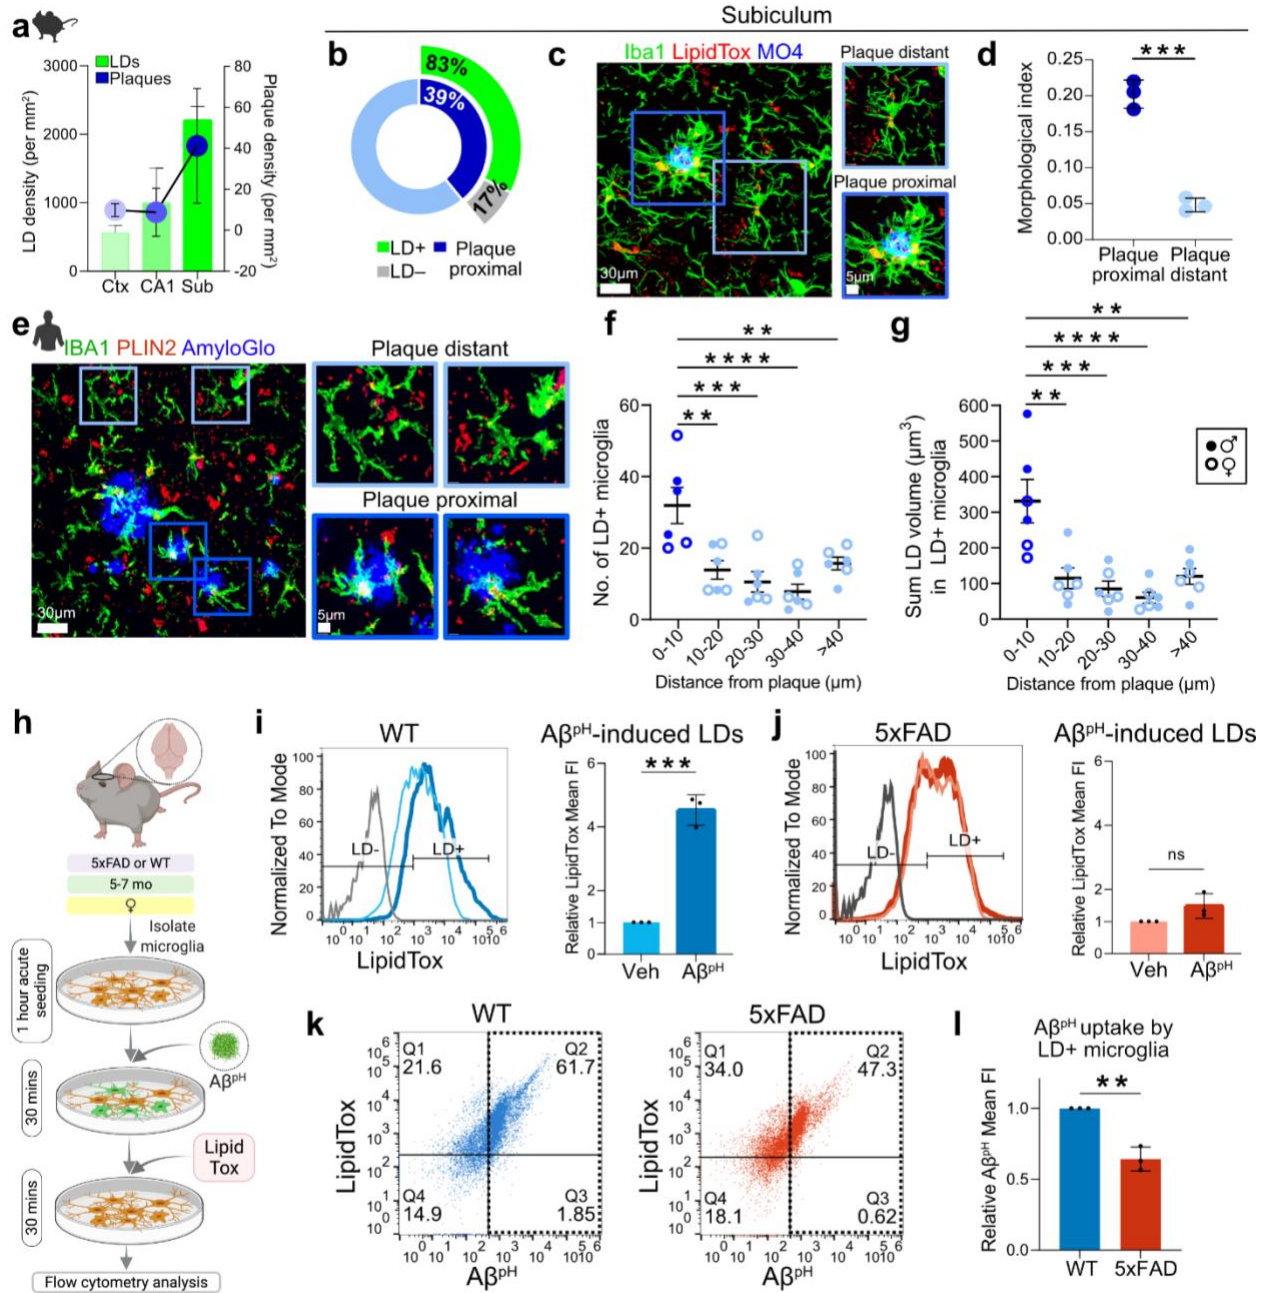

784

785

786 **Fig. 2: LD-laden microglia exhibit phagocytosis deficits and are in close proximity to amyloid**

787 **plaques in mice and humans.**

788 **a.** Parallel quantification in three different 5xFAD brain regions, shows that LD density seems to

789 correlate with plaque density, with the subiculum area of the hippocampus (Sub) where plaque

790 density is highest also demonstrating the highest LD density compared to CA1 or cortex (Ctx).

791 Data represent mean ± SD. N=3 5xFAD mice. **b.** Quantification of % LD<sup>+</sup> microglia that are

792 plaque-proximal or -distant in the subiculum of 5xFAD mice. Out of all microglia, 39% were in

793 contact with plaques, while 61% were away from plaques. Out of plaque-proximal microglia, 83%

794 were LD<sup>+</sup>, whereas only 17% were LD<sup>-</sup>. N=3 5xFAD mice. **c.** In the subiculum of 5xFAD mice,

795 microglia (IBA1, green) exhibited larger cell bodies, shorter processes, and higher LD content  
796 (LipidTox, red) when in close proximity to A $\beta$  plaques (MO4, blue), compared to plaque-distant  
797 microglia. **d.** Quantification showed a significantly higher morphological index in plaque-  
798 proximal compared to plaque-distant microglia in the 5xFAD subiculum; \*\*\* $P=0.0003$ . Data  
799 represent mean  $\pm$  SD. Unpaired t-test,  $N=3$  5xFAD mice. **e.** Immunofluorescence for lipid droplets  
800 (PLIN2), amyloid plaques (AmyloGlo), and microglia (IBA1) revealed larger LD volume in  
801 plaque-proximal microglia in the hippocampus of AD patients compared to plaque-distant  
802 microglia. **f.** The average number of IBA1<sup>+</sup> microglial fragments containing LDs per AD patient,  
803 was significantly increased within 10 $\mu$ m from the closest amyloid plaque compared to LD<sup>+</sup>  
804 microglial fragments detected 10-20 $\mu$ m (\*\* $P=0.003095$ ), 20-30 $\mu$ m (\*\*\* $P=0.000455$ ), 30-40 $\mu$ m  
805 ( $P=0.000095$ ) or >40 $\mu$ m (\*\* $P=0.008647$ ) from the closest amyloid plaque. **g.** The sum volume  
806 of all LDs within LD<sup>+</sup> microglial fragments was larger in cells located within 10 $\mu$ m from the  
807 closest amyloid plaque compared to LD<sup>+</sup> microglial fragments detected 10-20 $\mu$ m (\*\* $P=$   
808  $0.001158$ ), 20-30 $\mu$ m (\*\*\* $P=0.000241$ ), 30-40 $\mu$ m (\*\*\*\* $P=0.000065$ ) or >40 $\mu$ m (\*\* $P=0.001545$ )  
809 from the closest amyloid plaque. For **f-g**: Data represent mean  $\pm$  SEM. One-way ANOVA with  
810 Tukey's multiple comparison tests,  $N=6$  AD cases (3 males and 3 females). Individual values  
811 shown were averaged from 4 z-stacks imaged per patient. **h.** Experimental design for determining  
812 the phagocytic capacity and LD load of microglia from 5xFAD and WT female mice (5-7 months  
813 old). Microglia were isolated from mouse brains, acutely seeded onto the culture plates for 1 hour,  
814 treated with the A $\beta^{pH}$  probe for 30 mins, and with the LipidTox dye for another 30 mins before  
815 flow cytometry analysis. **i.** Quantification of LDs in A $\beta^{pH}$ - (blue) or vehicle-treated (cyan)  
816 microglia from WT mice with fluorescence minus one (FMO) A $\beta^{pH}$  only control (grey). A $\beta^{pH}$   
817 treatment induced an increase in LDs in WT microglia; \*\*\* $P=0.0002$ . **j.** Quantification of LDs in  
818 A $\beta^{pH}$ - (red) or vehicle-treated (pink) microglia from 5xFAD mice with FMO A $\beta^{pH}$  only control  
819 (charcoal). A $\beta^{pH}$  treatment did not induce an increase in LDs in 5xFAD microglia. **k.**  
820 Representative dot plots showing LD and A $\beta^{pH}$  uptake by microglia from WT and 5xFAD mice.  
821 Microglia from 5xFAD mice showed reduced A $\beta^{pH}$  uptake compared to microglia from WT mice.  
822 **l.** Quantification of A $\beta^{pH}$  uptake showed a phagocytic deficit in LD<sup>+</sup> microglia from 5xFAD  
823 compared to LD<sup>+</sup> microglia from WT mice; \*\* $P=0.0019$ . For **i, j** and **l**: Data represent mean  $\pm$  SD.  
824 Unpaired t-tests, cells were pooled from 3 mice per group (3 WT and 3 5xFAD mice) for each of  
825 the  $N=3$  experiments.

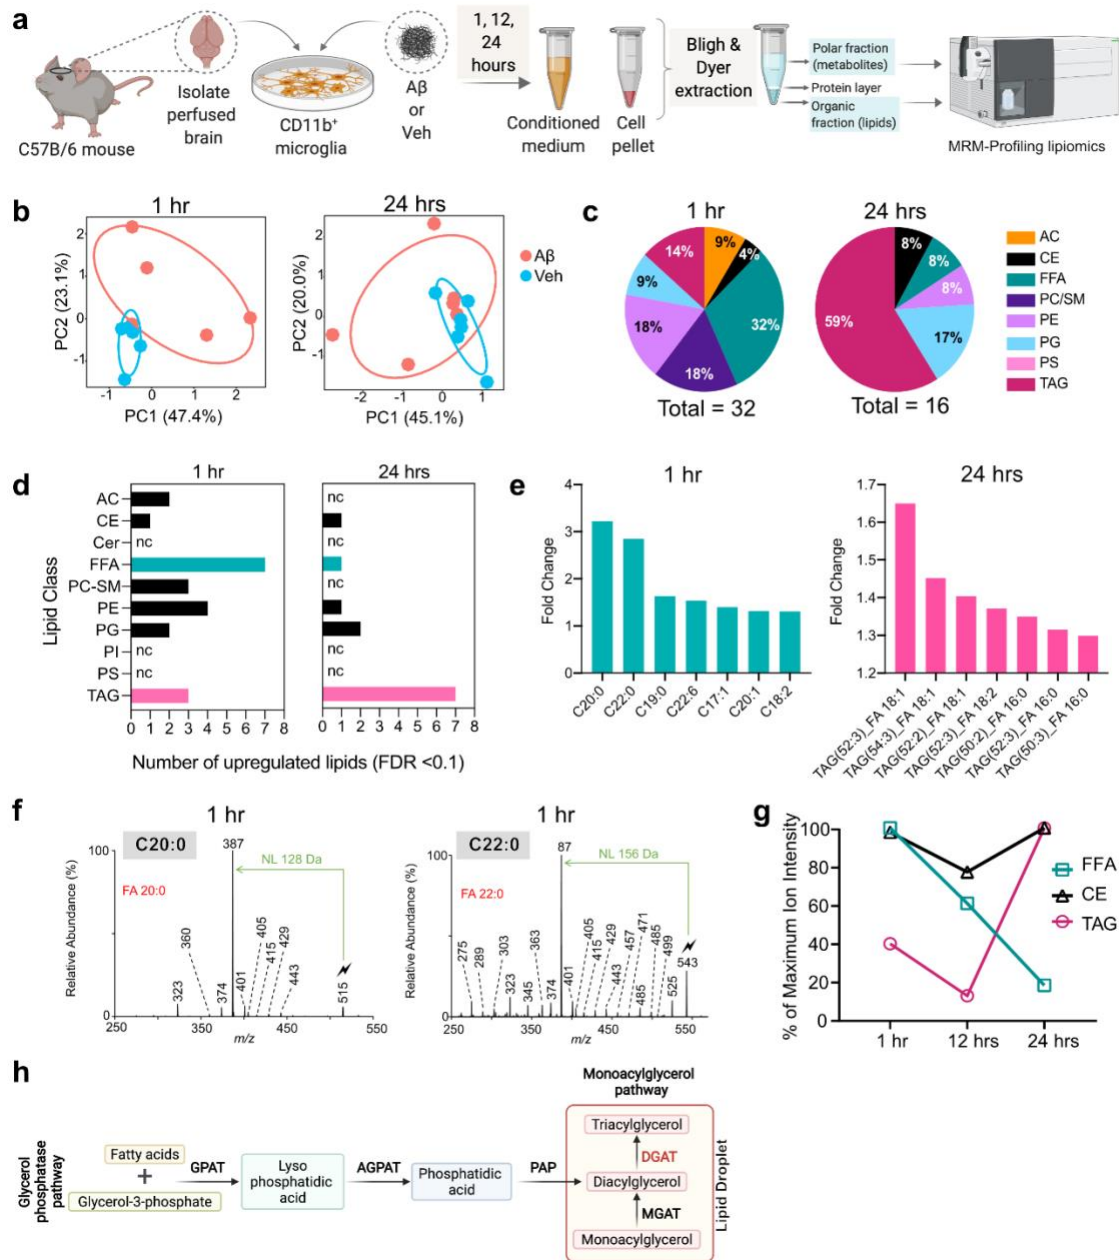

826  
827

828 **Fig. 3: A $\beta$  induces profound changes to the microglial lipidome and metabolome *in vitro*,**  
829 **resulting in LD formation.**

830 **a.** Experimental design for the global lipidomic profiling experiment performed on A $\beta$ - and  
831 vehicle-treated primary mouse microglia. Cells were isolated from ~7-month-old C56BL/6J  
832 perfused mouse brains and cultured in growth medium containing TGF- $\beta$ , IL-34, and cholesterol.  
833 Cells isolated from each brain were split and treated with 500 nM A $\beta$  or vehicle for 1, 12, and 24  
834 hours, followed by lipid and metabolite extraction from conditioned media and cell pellets, which  
835 were run on the Agilent triple quadrupole mass spectrometer. Lipids and metabolites were  
836 identified in the samples using MRM-profiling. Each experiment was repeated 5 or 6 times



837 resulting in: N=5 mice were used for 1-hour treatments, N=6 mice for 12 hours, and N=6 mice  
838 for 24 hours treatments. **b.** PCA demonstrating the variation in microglial lipidomes both within  
839 and between groups (A $\beta$  or vehicle treated microglia) at 1 and 24 hours of treatment. **c.** The  
840 distribution of significantly different lipid classes identified in microglia at 1 and 24 hours of A $\beta$   
841 treatment, compared to vehicle treated cells. 32% of the differentially regulated lipids at 1 hour  
842 were FFA, whereas 59% of the differentially regulated lipids at 24 hours were TAGs. **d.**  
843 Upregulated lipid classes at 1 and 24 hours of A $\beta$  treatment compared to vehicle, showed FFAs  
844 and TAGs were the most abundant lipids, respectively. **e.** Individual lipid species belonging to  
845 FFAs and TAGs that were upregulated at 1 and 24 hours of A $\beta$  treatment, compared to vehicle.  
846 Long-chain saturated FFAs C20:0, C22:0, and C19:0 were the top 3 upregulated FFAs within the  
847 first 1-hour of A $\beta$  treatment, while neutral lipids TAG(52:3)\_FA 18:1, TAG(54:3)\_FA 18:1, and  
848 TAG(52:2)\_FA 18:1 were the top three upregulated TAGs with prolonged 24-hour A $\beta$  treatment,  
849 both compared to vehicle. **f.** Structural identification and confirmation of the C20:0 and C22:0  
850 lipids in the 1-hour A $\beta$ -treated microglial samples, using the gas-phase ion/ion chemistry (see  
851 **Supplementary Results**). **g.** Percentage changes of maximum ion intensities as a quantitative  
852 measure of changes in the respective amounts of FFAs (green), TAGs (magenta), and CEs (black)  
853 in microglial cells at 1, 12, and 24 hours of A $\beta$  treatment. The reduction in FFAs was followed by  
854 an increase in TAGs and CEs – major components of LDs – suggesting a gradual conversion of  
855 FFAs to TAGs towards LD formation. **h.** Convergent pathways for TAG biosynthesis. Glycerol-  
856 3-phosphate acyltransferase (GPAT); acylglycerol-3-phosphate acyltransferase (AGPAT);  
857 phosphatidic acid phosphatase (PAP); monoacylglycerol acyltransferase (MGAT); and the final  
858 rate-limiting enzyme diacylglycerol acyltransferase (DGAT) that is needed for TAGs production  
859 and is involved in LD formation.  
860



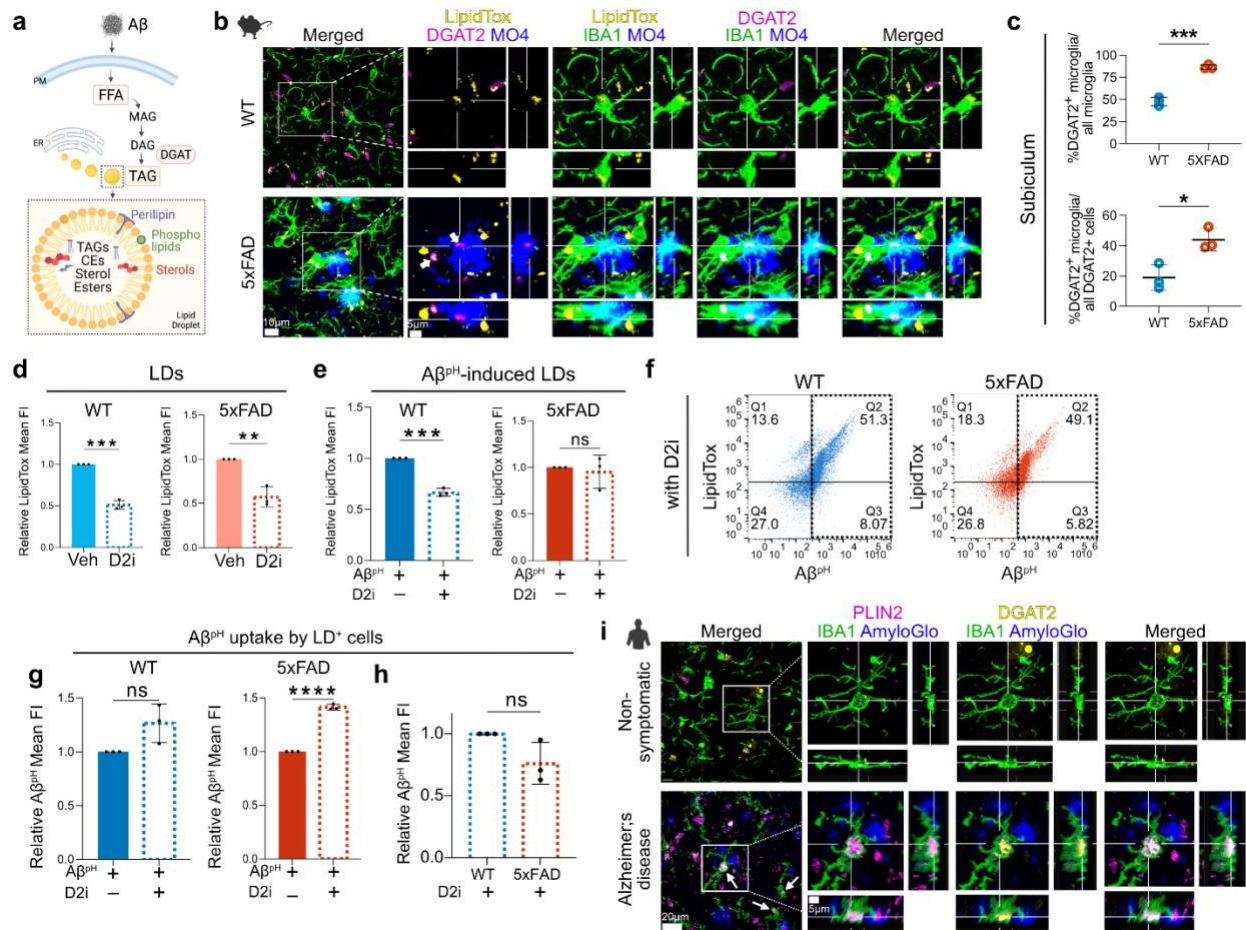

861

862

863 **Fig. 4: The DGAT2 enzyme is required for Aβ-induced LD formation, and inhibiting it**  
 864 **restores Aβ phagocytosis in microglia.**

865 **a.** Proposed mechanism for Aβ-induced LD formation in microglia. Microglial exposure to Aβ  
 866 induces an upregulation of FFAs that are converted to TAGs within LDs via the DGAT2 pathway.

867 **b.** Immunofluorescence staining of microglia (IBA1), LDs (LipidTox), DGAT2, and Aβ plaques  
 868 (MO4) in the hippocampal subicular region of 5xFAD and WT mouse brains. Increased DGAT2

869 is shown in microglia associated with amyloid plaques. **c.** Quantification showing a significant  
 870 increase in % of DGAT2<sup>+</sup> microglia out of all microglia and out of all DGAT2<sup>+</sup> cells in the mouse

871 subiculum in the 5xFAD tissue vs. WT; \**P* = 0.0181, \*\*\**P* = 0.0002. Data represent mean ± SD.  
 872 Unpaired t-test, *N* = 3 mice per group. **d.** DGAT2 inhibitor (D2i) treatment reduced LDs in cultured

873 microglia from WT and 5xFAD brains; \*\*\**P* = 0.0001, \*\**P* = 0.0029. **e.** Quantification showed  
 874 that D2i treatment reduced LD formation upon Aβ exposure in microglia from WT mice but not

875 in cells from 5xFAD mice; \*\*\**P* = 0.0001. **f.** Representative dot plots showing LD and Aβ<sup>PH</sup> uptake  
 876 by microglia treated with D2i from WT and 5xFAD mice. **g.** LD<sup>+</sup> microglia from WT mice showed

877 a slight but non-significant increase in Aβ<sup>PH</sup> uptake with D2i, while LD<sup>+</sup> microglia from 5xFAD  
 878 mice showed a significant increase in Aβ<sup>PH</sup> uptake with D2i; \*\*\*\**P* = 0.000014. **h.** Direct

879 comparison of the effect of D2i treatment on Aβ<sup>PH</sup> uptake by LD<sup>+</sup> microglia from WT and 5xFAD  
 880 showed that inhibiting DGAT2 restored the phagocytic performance of 5xFAD microglia, making

881 it comparable to that of WT cells. For **d**, **e**, **g** and **h**: Data represent mean ± SD. Unpaired t-tests,

882 cells were pooled from 3 mice per group (3 WT and 3 5xFAD mice) for each of the N=3  
883 experiments. **i.** DGAT2 expression in LD<sup>+</sup> microglia in close proximity to amyloid plaques in  
884 hippocampal FFPE tissue from human AD and NS cases (N=4 per group). Immunofluorescence  
885 was performed on 15µm-thick human hippocampal sections for the detection of DGAT2, lipid  
886 droplets (PLIN2), amyloid plaques (AmyloGlo) and microglia (IBA1). Increased DGAT2 signal  
887 (yellow) was detected in plaque-proximal LD<sup>+</sup> microglia in AD cases (arrows), compared to NS  
888 controls. Cross-sections of the selected microglial cells in the white boxes demonstrate  
889 representative example of increased DGAT2 signal in close proximity to a large PLIN2-labeled  
890 LD inside a plaque-proximal microglial cell in AD, and of a cell from a non-symptomatic case.  
891  
892

893 **SUPPLEMENTARY TABLE LEGENDS**

894

895 **Supplementary Table ST1: Analyzed lipidomics data of 5xFAD vs. WT microglia, including**  
896 **female and male samples.** Tables show the differential lipid profiles in 5xFAD vs. WT microglia  
897 samples, organized by most to least differentially-expressed lipids. Samples N1, N2, N3 belong to  
898 female mice and samples N4, N5 belong to male mice. P and FDR values are also provided and  
899 lipids with FDR<0.1 were considered to be significant.

900

901 **Supplementary Table ST2: Analyzed lipidomics data of 5xFAD vs. WT microglia, female**  
902 **only.** Table shows the differential lipid in 5xFAD vs. WT female microglia samples, organized by  
903 most to least differentially-expressed lipids. P and FDR values are also provided and lipids with  
904 FDR<0.1 were considered to be significant.

905

906 **Supplementary Table ST3: Raw MRM lipidomics data of 5xFAD vs. WT microglia.** Table  
907 lists the MRM transitions screened for TAGs and the respective ion intensity values, organized by  
908 MRM transition.

909

910 **Supplementary Table ST4: Analyzed metabolomics data for 5xFAD vs. WT microglia (male**  
911 **and female).** Tables show the differential metabolites in 5xFAD vs. WT microglia, organized by  
912 most to least differentially-expressed metabolites. P and FDR values are also provided and  
913 metabolites with FDR<0.1 were considered to be significant.

914

915 **Supplementary Table ST5: Pathway analysis for 5xFAD vs. WT microglial metabolites.** A  
916 list of all pathways matched to the differentially-expressed metabolites (FDR<0.1) is provided in  
917 the table. The pathways with P<0.05 were considered to be significant and are highlighted in the  
918 scatter plots in the supplementary figures.

919

920 **Supplementary Table ST6: Analyzed lipidomics data for A $\beta$ - vs. vehicle-treated primary**  
921 **microglial cells at 1, 12, and 24 hours.** Tables show the differential lipid profiles in A $\beta$ - vs.  
922 vehicle-treated cells at the three different time points, organized by most to least differentially-  
923 expressed lipids. P and FDR values are also provided and lipids with FDR<0.1 were considered to  
924 be significant.

925

926 **Supplementary Table ST7: Analyzed lipidomics data of A $\beta$ - vs. vehicle-treated primary**  
927 **microglial cell conditioned media at 1, 12, and 24 hours.** Tables show the differential lipid  
928 profiles in A $\beta$ - vs. vehicle-treated conditioned media samples at the three different time points,  
929 organized by most to least differentially-expressed lipids. P and FDR values are also provided and  
930 lipids with FDR<0.1 were considered to be significant.

931

932 **Supplementary Table ST8: Analyzed metabolomics data of A $\beta$ - vs. vehicle-treated primary**  
933 **microglial cells at 1, 12, and 24 hours.** Tables show the differential metabolites in A $\beta$ - vs.  
934 vehicle-treated cells at the three different time points, organized by most to least differentially-  
935 expressed metabolites. P and FDR values are also provided and metabolites with FDR<0.1 were  
936 considered to be significant.

937

938 **Supplementary Table ST9: Analyzed metabolomics data of A $\beta$ - vs. vehicle-treated primary**  
939 **microglial cell conditioned media at 1, 12, and 24 hours.** Tables show the differential  
940 metabolites in A $\beta$ - vs. vehicle-treated conditioned media samples at the three different time points,  
941 organized by most to least differentially-expressed metabolites. P and FDR values are also  
942 provided and metabolites with FDR<0.1 were considered to be significant.

943  
944 **Supplementary Table ST10: Raw MRM lipidomics data of A $\beta$ - vs. vehicle-treated primary**  
945 **microglial cell conditioned media at 1 and 24 hours.** The table lists the MRM transitions  
946 screened for TAGs and the respective ion intensity values at two different time points, organized  
947 by MRM transition.

948  
949 **Supplementary Table ST11: Pathway analysis for cell metabolites at 1, 12, and 24 hours of**  
950 **A $\beta$ - vs. vehicle-treated primary microglia cultures.** List of all pathways matched to the  
951 differentially-expressed metabolites (FDR<0.1) are highlighted in the tables. The pathways with  
952 P<0.05 were considered to be significant and are highlighted in the scatter plots in the  
953 supplementary figures.

954  
955 **Supplementary Table ST12: Pathway analysis for media metabolites at 1, 12, and 24 hours**  
956 **of A $\beta$ - vs. vehicle-treated primary microglia cultures.** List of all pathways matched to the  
957 differentially-expressed metabolites (FDR<0.1) are highlighted in the tables. The pathways with  
958 P<0.05 were considered to be significant and are highlighted in the scatter plots in the  
959 supplementary figures.

960  
961

## 962 **SUPPLEMENTARY MOVIE LEGEND**

963

964 **Supplementary Movie 1: 3D rendered plaque-proximal microglia show increased LDs in**  
965 **human AD patients.** Representative confocal z-stack for which 3D “Surfaces” were made in  
966 Imaris for IBA1, PLIN2 and AmyloGlo channels. Only LDs in microglia (red) are shown. Plaque-  
967 proximal microglia (yellow) defined by a 0-10 $\mu$ m distance from the closest plaque (purple) contain  
968 increased LDs (red) compared to plaque-distant (>10 $\mu$ m from closest plaque) LD+ microglia  
969 (green). Plaque-proximal LD- microglia are also shown in orange.

970

971

## 972 **STAR Methods**

973

### 974 **Animals**

975 C57BL/6J and 5xFAD mice were obtained from the Jackson Laboratory and were maintained in a  
976 pathogen free facility. All experiments involving mice were performed in accordance with the  
977 Purdue University’s Institutional Animal Care and Use Committee (IACUC) guidelines.

978

### 979 **Primary mouse microglia isolation and culture from adult mouse brains**

980 Primary microglia from adult mouse brains were isolated and cultured per a previously-described  
981 protocol<sup>43</sup>. Briefly, CD11b<sup>+</sup> primary microglia were isolated from adult mice (both male and  
982 female) and cultured as described previously<sup>43</sup>. Mice were euthanized with CO<sub>2</sub> according to  
983 IACUC guidelines, and perfused brains were removed and cut into small pieces before



984 homogenization in 1x Dulbecco's phosphate-buffered saline with Calcium and Magnesium  
985 (DPBS<sup>++</sup>) with 0.4% DNase-I on the tissue dissociator at 37 °C. After filtering the cells through a  
986 70- $\mu$ m filter, myelin was first removed using Percoll PLUS reagent (GE Healthcare #45001754),  
987 then again by using myelin removal beads. After myelin removal, CD11b<sup>+</sup> cells were selected from  
988 the single-cell suspension using the CD11b beads (Miltenyi) as per the manufacturer's instructions.  
989 The CD11b<sup>+</sup> cells were finally resuspended in microglia growth media<sup>68</sup>, further diluted in TIC  
990 (TGF- $\beta$ , IL-34, and cholesterol containing) media with 2% FBS (Atlanta Biologics #S11150, Lot  
991 #H17115) before seeding 1x10<sup>5</sup> cells per 500  $\mu$ L in a well of a 24-well plate (Falcon). The cells  
992 were maintained in TIC media at 37°C and 10% CO<sub>2</sub>, with media being changed every other day  
993 until the day of A $\beta$  treatment (around 12-14 days *in vitro* (d.i.v.)).

994

### 995 **A $\beta$ preparation**

996 The solid human A $\beta$ 1-42 peptide (Anaspec #20276) was prepared per our previously-described  
997 protocol<sup>69</sup>. Briefly, the peptide was dissolved in 20 mM NaOH, pH=10.5 to make ~100  $\mu$ M stock  
998 solution. Peptide aggregation was initiated by incubating the solution at 37°C for 24 hours. The  
999 peptide was then either stored at -80°C or used directly on the cells after being diluted in culture  
1000 medium and filtered through a 0.22  $\mu$ m syringe filter.

1001

### 1002 **Treatment of A $\beta$**

1003 Primary microglia were treated with 500  $\mu$ L/well of 500 nM A $\beta$ 1-42 or vehicle for 1, 12, or 24  
1004 hours. After the respective time points, the conditioned media (CM) from each well was collected  
1005 and stored at -80°C. The cells were then detached from wells with 0.25% trypsin and collected in  
1006 1x phosphate-buffered saline (PBS) before pelleting at 500 xg for 6 mins at 4°C. The supernatant  
1007 was aspirated, and pellets were also stored at -80°C along with the CM for direct injection-MS/MS  
1008 and MRM-profiling.

1009

### 1010 **Lipid extraction by the Bligh & Dyer method**

1011 Lipid and metabolite extracts were prepared using a slightly modified Bligh & Dyer extraction  
1012 procedure<sup>70</sup>. The frozen cell pellets from primary microglia were thawed at room temperature, and  
1013 ultrapure water, methanol, and HPLC-grade chloroform were added to the pellets. The samples  
1014 were vortexed, resulting in a one-phase solution that was then incubated at 4°C for 15 mins. Next,  
1015 ultrapure water and chloroform were added, resulting in a biphasic solution. The samples were  
1016 centrifuged at 16,000 xg for 10 mins, resulting in 3 phases in each tube. The bottom organic phase  
1017 containing the lipids were transferred to new tubes, while the middle phase consisting of proteins  
1018 and the upper polar phase were discarded. The solvents from the organic phase were evaporated  
1019 in a speed-vac. The dried lipid extracts were dissolved in acetonitrile/methanol/300 mM  
1020 ammonium acetate (3:6.65:0.35 v/v/v). The lipid extract solutions were diluted further 50 times  
1021 before running them on a mass spectrometer.

1022

### 1023 **Unbiased lipidomic and TAG-species profiling using MRM-profiling**

1024 To determine if there were differences in lipid profiles that occur with A $\beta$  activation over 24 hours,  
1025 lipids extracted from cell lysates as well as conditioned medium were processed for Multiple  
1026 Reaction Monitoring (MRM)-profiling<sup>71,72</sup>. Instruments used in these experiments are listed in the  
1027 supplemental material. The detailed methodology of MRM-profiling for targeted lipid profiling  
1028 has been described previously<sup>73</sup>. This method enabled the interrogation of the relative amounts of  
1029 numerous lipid species within ten major classes of lipids based upon the LipidMaps database<sup>74</sup>.

1030 The lipid classes, along with the total number of MRM transitions screened, are presented in **Fig.**  
1031 **S1b**. Due to the large number of triacylglycerol (TAG) lipid species interrogated in this study,  
1032 TAGs were run in two separate methods (TAG 1 and TAG 2), each measuring relative ion  
1033 transitions for different TAG species. The TAG species measured in each method were arbitrarily  
1034 divided. For sample preparation, dried lipid extracts were diluted in methanol:chloroform (3:1 v/v)  
1035 and injection solvent to obtain a stock solution. Then, the diluted lipid extract was delivered to the  
1036 ESI source of an Agilent 6410 triple quadrupole mass spectrometer to acquire the mass  
1037 spectrometry data by flow injection (no chromatographic separation). The raw MS data obtained  
1038 were processed using an in-house script, and the lists containing MRM transitions along with the  
1039 respective ion intensity values were exported to Microsoft Excel for statistical analyses to identify  
1040 the significant lipids and metabolites in A $\beta$ -treated versus vehicle-treated microglia. Individual  
1041 TAG species were also profiled in primary cultured microglial cells treated with A $\beta$  and vehicle  
1042 controls, as well as 5xFAD and WT acutely-isolated microglia using MRM-profiling methodology  
1043 as described above. Briefly, diluted lipid extracts were directly infused into the Agilent Jet Stream  
1044 ion source of an Agilent 6495C triple quadrupole mass spectrometer. TAG molecular species were  
1045 identified based upon previously-established MRMs.

1046

#### 1047 **Statistical analyses for lipidomics and metabolomics**

1048 Statistical analyses were performed according to our recently-published study<sup>75</sup>. The edgeR  
1049 package<sup>76</sup> was used for A $\beta$ - versus vehicle-treated microglia comparisons, as well as comparisons  
1050 of 5xFAD vs. WT microglia. Abbreviation “*s*” was used to denote sample, which represent  
1051 different replicates of an analyte class and “*b*” was used to indicate a biomarker such as a single  
1052 lipid or metabolite. Ion counts of a biomarker were denoted using these two subscripts. The  
1053 experimental blank that was done with the injection media was modeled as an ‘intercept’ sample  
1054 in the analysis to make certain that comparisons were significant with respect to the blank. A  
1055 generalized linear model was fitted using the edgeR package<sup>76</sup> for the mean variance as follows:

1056

$$1057 \log \mu_{bs} = X_s^T \beta_b + \log N_s$$

1058

1059 Here,  $N_s$  represents the sum of all ion intensities for the sample *s*. The coefficient of variance (CV)  
1060 for a biomarker ion counts in a sample ( $y_{bs}$ ) can be calculated using the following equation:

1061

$$1062 CV^2(y_{bs}) = 1/\mu_{bs} + \Phi_b$$

1063

1064 Dispersion of the biomarker was denoted as  $\Phi_b$  and it was estimated using the common dispersion  
1065 method<sup>77</sup>. The associated log-fold change was calculated between the A $\beta$ -treated and vehicle-  
1066 treated microglia and p-values were obtained using the likelihood ratio test. The BH method was  
1067 used to calculate p-values to acquire false discovery rates (FDRs)<sup>78</sup> and a lipid or a metabolite was  
1068 considered to be significant if fold change > 0.5 and FDR < 0.1.

1069

#### 1070 **Lipid droplet staining of acutely-isolated microglia in suspension**

1071 CD11b<sup>+</sup> cells were isolated from male and female mice (3-4 or 5-7 months old; 5xFAD or WT)  
1072 and resuspended in 1x PBS, counted using a hemocytometer (1:10 ratio of trypan blue to cell  
1073 suspension) and stained with 2  $\mu$ M BODIPY in 1x PBS for 1 hour at 37°C. The cells were then  
1074 washed once, resuspended in 1x PBS and taken for analysis on an Attune NxT flow cytometer  
1075 (Invitrogen) after staining of dead cells with DAPI.

1076

1077 **Perfusion and tissue processing**

1078 Mice were euthanized with CO<sub>2</sub> and transcardially perfused with PBS and 4% paraformaldehyde  
1079 (PFA). Brains were extracted and coronally sectioned (50 μm) using a vibratome and stored in  
1080 antigen solution (30% glycerol, 30% ethylene glycol, in PBS) at -20°C until use for IHC staining.

1081

1082 **Immunohistochemistry and staining**

1083 Free-floating sections were washed five times in PBS, followed by incubation with Methoxy X04  
1084 (10μM, Tocris Bioscience,) solution in PBS for 15 minutes. Sections were then stained with HCS  
1085 LipidTox Green Neutral Lipid Stain (1:1000, ThermoFisher) in PBS for 15 min, followed by  
1086 incubation with antigen retrieval buffer (10mM sodium citrate, 0.05% Tween20, pH=6.0) at 70°C  
1087 for 40 min. The sections were allowed to cool, washed, and treated with 0.1% NaBH<sub>4</sub> for 30 min.  
1088 Following antigen retrieval, sections were blocked with blocking buffer (5% NGS, 0.01% Triton  
1089 X-100, in PBS) for 1 hr at room temperature. The sections were then incubated overnight with the  
1090 following primary antibodies: anti-IBA1 (1:150, Millipore Sigma) anti-DGAT2 (1:150,  
1091 ThermoFisher) in blocking buffer at 4°C. Post-incubation, sections were washed thoroughly with  
1092 PBS + 0.01% Triton X-100 and incubated with secondary antibodies: Goat anti-Mouse Alexa  
1093 Fluor 594), Goat anti-Mouse Alexa Fluor 647 and Goat anti-Rabbit Alexa Fluor 594 (all from  
1094 Invitrogen and diluted at 1:500) for 1.5 h at room temperature. Following washes with PBS +  
1095 0.01% Triton X-100, sections were mounted on slides, allowed to dry, and coverslipped using  
1096 Fluoromount-G anti-fade mounting medium (Southern Biotech).

1097

1098 ***Ex-vivo* Lipid droplet staining and Aβ phagocytosis assay of acutely-seeded microglia**

1099 Following the protocol described above for cell isolation, 100K CD11b<sup>+</sup> cells from 5-7-month-old  
1100 female C57BL/6J mice were seeded in TIC media for 1 hour, followed by 500 nM Aβ<sup>pH</sup> (in TIC  
1101 media) / vehicle treatment for 30 minutes. Post-treatment, the cells were stained with LipidTox  
1102 (1:200) in 1xPBS for 30 minutes at 37°C. After staining, the cells were washed with 1x PBS,  
1103 detached, and collected in ice-cold 1x PBS. Three minutes before analysis of each sample, DAPI  
1104 was used to stain dead cells. Single positive controls, gating strategies and analyses were done as  
1105 described above, but for this experiment live LipidTox<sup>+</sup> or LipidTox<sup>-</sup> cells were identified on the  
1106 Alexa-Fluor 647 channel, while Aβ<sup>pH+</sup> and Aβ<sup>pH-</sup> cells were identified on the FITC channel on an  
1107 Attune NxT flow cytometer (Invitrogen).

1108

1109 **Treatment of DGAT2 inhibitor (D2i) and *ex-vivo* lipid droplet staining and Aβ phagocytosis  
1110 assay of acutely-seeded microglia**

1111 The above protocol was followed with slight modifications for D2i (PZ0233, Sigma) treatment.  
1112 Briefly, CD11b<sup>+</sup> cells were seeded TIC media containing 15 μM D2i / vehicle for 1 hour, followed  
1113 by 500 nM Aβ<sup>pH</sup> (in TIC media) / vehicle containing 15 μM D2i / vehicle treatment for 30 minutes.  
1114 Post-treatment, the cells were washed with 1xPBS and stained with LipidTox (1:200) containing  
1115 15 μM D2i / vehicle in 1xPBS for 30 minutes at 37°C. After staining, the cells were washed with  
1116 1x PBS, detached, and collected in ice-cold 1x PBS containing 15 μM D2i / vehicle and analyzed  
1117 on the flow cytometer.

1118

| Sample                | Aβ <sup>pH</sup> | LipidTox | D2i |
|-----------------------|------------------|----------|-----|
| LipidTox only         | -                | +        | -   |
| Aβ <sup>pH</sup> only | +                | -        | -   |

|                                         |   |   |   |
|-----------------------------------------|---|---|---|
| A $\beta$ <sup>PH</sup> + LipidTox      | + | + | - |
| LipidTox+ D2i                           | - | + | + |
| A $\beta$ <sup>PH</sup> + LipidTox+ D2i | + | + | + |

1119

### 1120 ***Dgat2* mRNA expression by PCR**

1121 CD11b<sup>+</sup> cells isolated from 5-7-month-old female mice (5xFAD and WT) were resuspended in 1x  
1122 PBS, counted using a hemocytometer (1:10 ratio of trypan blue to cell suspension) and stored at -  
1123 80 °C until next step. Total RNA was isolated and purified by using Quick-RNA Miniprep Kit  
1124 (Zymo Research) following the manufacturer's protocol. RNA quantification and purity were  
1125 assessed using Varioskan LUX imaging multi-mode reader (Thermo Scientific). Real-time PCR  
1126 was conducted using TaqMan probes (Applied Biosystems, Foster City, CA) for *Dgat2*  
1127 (Mm00499536\_m1) and the mouse housekeeping gene  $\beta$ -actin (Mm00607939\_s1) as an  
1128 endogenous control. For PCR amplification, an initial denaturation at 95°C for 15 min was  
1129 followed by 40 cycles of denaturation at 95°C for 10 s and annealing at 60°C for 1 min. Reactions  
1130 were run in duplicate. Open qPCR software version 1.0.2 (Chai Biotechnologies Inc.) was used  
1131 for post-amplification analysis. Cq and Tm values were calculated directly by the instrument  
1132 software and used for finding fold change for *Dgat2* gene expression in 5xFAD relative to WT by  
1133 the comparative  $2^{-\Delta\Delta CT}$  method.

1134

### 1135 **Stimulated Raman Scattering (SRS) microscopy for label-free lipid droplet imaging**

1136 A dual-output 80-MHz femtosecond pulsed laser source (InSight X3+, Spectra-Physics) was used  
1137 for the excitation of SRS. The wavelength-tunable output (680-1300 nm) was used as the pump  
1138 beam and the 1045 nm fixed-wavelength output was used as the Stokes beam. The pump beam  
1139 was tuned to 800 nm to image CH vibrations in brain samples. Both beams had a pulse duration  
1140 of ~120 fs. The Stokes beam was directed into an acousto-optic modulator (ISOMET, M1205-  
1141 P80L-0.5), which was controlled by a radio frequency driver (ISOMET, 522B-L) and modulated  
1142 by a function generator (DG1022Z, Rigol). A square wave of 2.5 MHz and 50% duty cycle was  
1143 used for laser intensity modulation. The 0<sup>th</sup> order laser beam from the AOM was used for  
1144 excitation. The beams were combined spatially by a dichroic beam splitter and were chirped using  
1145 glass rods (SF57, Lattice Electro-Optics). One 150 mm rod was placed only in the probe beam  
1146 pathway, while two 150 mm rods were used after combining the two beams. We bent the optical  
1147 beam path to double-pass the two chirping rods to increase the chirping. This gives a 1+4 (Stokes  
1148 + combined) chirping configuration, which chirps the pump beam to 3.4 ps and the Stokes beam  
1149 to 1.8 ps. The laser power used on the sample was ~ 15 mW for the pump and ~30 mW for the  
1150 Stokes beam. A motorized linear translational stage (X-LSM050A, Zaber Technology) was used  
1151 to scan the optical delay between pump and Stokes beams, which were converted to Raman shifts  
1152 by spectral focusing. The optical delay scanning steps were 10  $\mu$ m per step. The combined beams  
1153 were scanned by a 2D galvo scanner set (GVS002, Thorlabs) installed to an upright microscope  
1154 for imaging. A 60x/1.2 NA water immersion objective lens (UPLSAPO 60X, Olympus) was used  
1155 to focus the beams onto the sample. The SRS signal was collected by a 1.4 NA oil-immersion  
1156 condenser. The pump beam was detected with a photodiode detector (S3994, Hamamatsu) with a  
1157 short-pass filter (980 SP, Chroma technology) to reject the Stokes beam. The alternate voltage  
1158 signal was amplified using a lab-built tuned amplifier centered at 2.5 MHz. The SRS signal was  
1159 extracted using a lock-in amplifier (HF2LI, Zurich Instruments). A 2D translation stage (H101,  
1160 ProScan III, Prior Technology) was used to control sample positions and to perform automated  
1161 large-area image acquisition and stitching. Data acquisition was enabled using a high-speed data



1162 acquisition card (PCIe 6363, National Instruments). The laser scanning and image acquisition was  
1163 performed by custom-written software based on LabVIEW.

1164

### 1165 **Analysis of SRS microscopy data**

1166 For analysis, the images were saved in .txt files and processed using ImageJ. Pseudocolors were  
1167 used to display different chemical compositions. Hyperspectral images were used to obtain spectra  
1168 of lipid droplets and other chemical compositions of the tissue. The spectral profiles were  
1169 normalized by using a laser intensity profile obtained from cross-phase modulation. For  
1170 quantitative image analysis a Gaussian blur filter ( $r=3$ ) was used to process the original image.  
1171 Then, the processed image was subtracted from the original image to highlight the lipid droplets.  
1172 Intensity thresholding and particle analysis were then performed using ImageJ built-in functions  
1173 for quantitative lipid droplet analysis. For quantitative analysis results, areas from the WT and  
1174 5xFAD sections were selected and the lipid droplets were analyzed within each area. Merging of  
1175 different image channels was performed using ImageJ. The percentage was calculated by dividing  
1176 the number of pixels corresponding to LD signal by the total number of pixels of the entire image.

1177

### 1178 **Saturated fatty acid structure elucidation using gas-phase ion/ion chemistry**

1179 Utilizing gas-phase ion/ion chemistries, the detailed structural elucidation of complex lipids in  
1180 biological mixtures has been demonstrated previously<sup>79,80</sup>. Here, a charge inversion ion/ion  
1181 reaction strategy was employed to examine the structure of saturated fatty acids. All experiments  
1182 were conducted on a Sciex QTRAP 4000 triple quadrupole/linear ion trap mass spectrometer  
1183 (SCIEX, Concord, ON, Canada) that has been modified to perform ion/ion reactions<sup>81</sup>. To facilitate  
1184 the mutual storage of oppositely-charged ions, the key instrumental modifications involve the  
1185 ability to apply AC voltages to the end plates of the q2 reaction cell. Alternately, pulsed  
1186 nanoelectrospray ionization (nESI) emitters permit the sequential injection of tris-phenanthroline  
1187 magnesium reagent dications and fatty acid analyte anions<sup>82</sup>. Singly-deprotonated fatty acid  
1188 anions, denoted  $[FA - H]^-$  anions, generated via direct negative nESI of the lipid extract or  
1189 authentic reference standard were mass-selected with unit resolution during transient through Q1  
1190 and subsequently transferred to the high-pressure collision cell, q2, for storage. Next, positive nESI  
1191 produced tris-phenanthroline magnesium dications, denoted  $[MgPhen_3]^{2+}$ , which were isolated in  
1192 Q1 prior to accumulation in the reaction cell q2. The  $[FA - H]^-$  anions and  $[MgPhen_3]^{2+}$  reagent  
1193 dications were then mutually stored in q2, yielding the  $[FA - H + MgPhen_2]^+$  complex cation.  
1194 Energetic transfer from the reaction cell q2 to the linear ion trap (LIT), Q3, resulted in the neutral  
1195 loss of a single phenanthroline ligand and the generation of the charge-inverted complex cation  
1196 referred to as  $[FA - H + MgPhen]^+$ . Following mass-selection in Q3, the analysis of charge inverted  
1197 product ions was performed using single-frequency resonance excitation, commonly referred to as  
1198 ion-trap collision-induced dissociation (CID) ( $q = 0.383$ ). In summary, reproducible spectral  
1199 patterns facilitate fatty acid identification<sup>79</sup>. In all cases, mass analysis was performed using mass-  
1200 selective axial ejection (MSAE)<sup>83</sup>.

1201

### 1202 **Pathway analysis for metabolomics data**

1203 Metabolomic pathway analysis was performed using the MetPA<sup>84</sup> (metabolomics pathway  
1204 analysis) tool on MetaboAnalyst 5.0: a free, web-based tool for metabolomics data analysis that  
1205 uses the KEGG metabolic pathways as the backend knowledge-base. The differentially-regulated  
1206 metabolites (FDR<0.1) were uploaded into the compound list with hypergeometric test as the  
1207 enrichment method and relative-betweenness centrality for topology analysis. The KEGG pathway

1208 library for *Mus musculus* was chosen as the reference database. All of the matched pathways  
1209 according to the p values from the pathway enrichment analysis and pathway impact values from  
1210 the pathway topology analysis were visualized using the “metabolome view” scatter plot.  
1211

### 1212 **Human brain tissue staining**

1213 Human hippocampal formalin-fixed paraffin-embedded (FFPE) tissue sections from autopsy  
1214 samples of both male and female Alzheimer’s disease (AD) patients (>74 years, n=3 per sex) and  
1215 non-symptomatic (NS) cases (>62 years, n=3 per sex) were used. NS cases were obtained from  
1216 individuals without any neurological or psychiatric diagnosis, and no chronic systemic  
1217 inflammatory or infectious condition. All human post-mortem tissue was obtained from the  
1218 Pathology Research Core in the Robert J. Tomsich Pathology and Laboratory Medicine Institute  
1219 of the Cleveland Clinic. Institutional ethical guidelines were followed for the appropriate use of  
1220 these fully de-identified samples for research purposes, after IRB approval. All tissue samples  
1221 were cut at 15  $\mu\text{m}$  and standard de-paraffinization procedures in xylene and decreasing  
1222 concentration ethanol solutions were utilized. Sections were stained for amyloid plaques using  
1223 Amylo-Glo RTD Amyloid Plaque Stain Reagent (Biosensis) according to the manufacturer’s  
1224 instructions. Then antigen retrieval was performed in 10mM Tris / 1mM EDTA buffer (pH=8.0)  
1225 for 20 min at 97°C. After cooling down to room temperature, sections were rinsed with distilled  
1226 water and blocked in 10% normal donkey serum in PBS-Tween-20 0.05% (v/v) for 1 hour. Primary  
1227 antibodies were added in blocking buffer and sections were incubated for 72hr at 4°C (anti-  
1228 Adipophilin (PLIN2 Fitzgerald Industries International, 1:200); rabbit anti-DGAT2,  
1229 (ThermoFisher, 1:200); anti-IBA1, (Millipore, 1:200). Sections were washed with PBS-T 0.05%  
1230 (v/v) and incubated with secondary antibodies in blocking buffer for 2h at room temperature  
1231 (Jackson Immunoresearch: donkey anti-guinea pig AF594, 1:500; donkey anti-rabbit FITC,  
1232 1:1000; alpaca anti-mouse Cy5, 1:100). Autofluorescence was quenched with TrueBlack-  
1233 Lipofuscin autofluorescence quencher (Biotium) according to the manufacturer’s instructions and  
1234 sections were coverslipped with anti-fade fluorescence mounting medium (Abcam). Imaging was  
1235 performed using a Zeiss LSM 800 confocal microscope using a 40x 1.3NA oil immersion lens and  
1236 quantification of lipid droplets in relation to microglia and amyloid plaques was performed using  
1237 the surfaces module in Imaris 9.8.2 (Bitplane).  
1238

### 1239 **Image processing**

1240 Confocal microscopy images in Figures **1i**, **2c** and **4b** were processed using Imaris 9.8.2 (Bitplane)  
1241 to reduce noise by applying the Gaussian or Median filters. For **1i** and **2c**, remaining non-specific  
1242 speckles in the IBA1 channel (likely produced during the antigen retrieval and  
1243 immunofluorescence protocol) were removed by size exclusion of 3D objects smaller than 1 or 2  
1244  $\mu\text{m}^3$  using the Imaris tool "surfaces". A similar approach was also used for confocal microscopy  
1245 images acquired from human post-mortem FFPE tissue sections that often show artefacts from the  
1246 deparaffinization and antigen retrieval protocols. 3D objects smaller than 2 or 3  $\mu\text{m}^3$  (for IBA1)  
1247 and 1  $\mu\text{m}^3$  (for PLIN2) were removed using Imaris. This size exclusion of speckles and artifacts  
1248 also ensured that only true LD particles were selected for visualization and quantification in the  
1249 PLIN2 channel. For the DGAT2 channel, only the Gaussian filter was applied to reduce noise. The  
1250 mouse brain confocal microscopy images were processed using ImageJ and the despeckle tool was  
1251 used to remove the fine noise / grainy speckles from the images prior to being used for LD  
1252 quantification using the ‘Analyze particles’ function coupled with the ROI manager tool.  
1253

1254 **Statistical analyses**

1255 Data collection was randomized for all experiments and experimenters were blinded for imaging  
1256 and data analyses. All statistical analyses were performed using GraphPad Prism version 8.2.1 or  
1257 on R version 4.1.2. Mean between two groups were compared using two-tailed unpaired Student's  
1258 t-test. Data from multiple groups were analyzed by one-way analysis of variance (ANOVA) with  
1259 Tukey's multiple comparison tests. Information on the sample size, numbers of replicates and  
1260 statistical test used for each experiment is included in the figure legends.

1261

1262

1263
